# Supplementary material for: Effect of donor modification on the photo-physical and photo-voltaic properties of N-alkyl/aryl amine based chromophores
Source: Royal Society of Chemistry journal article supplement (doi:10.1039/c8nj06196c), 2019-01-01
Supplement: c8nj06196c1.pdf [file c8nj06196c1.pdf]

## Supporting Information

### **Effect of Donor Modification on Photo-Physical and Photo-Voltaic Properties of N-Alkyl /Aryl Amines Based Chromophores**

Manoj M Jadhav<sup>1</sup>, Jayraj V Vaghasiya<sup>2,3</sup>, Dinesh S Patil<sup>1</sup>, Saurabh S Soni,<sup>2,\*</sup> Nagaiyan Sekar<sup>1,\*</sup>

<sup>1</sup>*Department of Dyestuff Technology, Institute of Chemical technology, N. P. Marg, Matunga, Mumbai, Maharashtra 400019, India*

<sup>2</sup>*Department of Chemistry, Sardar Patel University, Vallabh Vidyanagar, 388120, India*

<sup>3</sup>*Department of Materials Science and Engineering, National University of Singapore, 9 Engineering Drive 1, 117575, Singapore*

| <b>Sr. No.</b>   | <b>Content</b>                                                                                                                                                                                                                                                                                       | <b>Page No.</b> |
|------------------|------------------------------------------------------------------------------------------------------------------------------------------------------------------------------------------------------------------------------------------------------------------------------------------------------|-----------------|
| <b>1</b>         | Synthesis                                                                                                                                                                                                                                                                                            | <b>S4</b>       |
| <b>Table S1</b>  | Photophysical data of <b>MD1</b>                                                                                                                                                                                                                                                                     | <b>S6</b>       |
| <b>Table S2</b>  | Photophysical data of <b>MD2</b>                                                                                                                                                                                                                                                                     | <b>S6</b>       |
| <b>Table S3</b>  | Photophysical data of <b>MD3</b>                                                                                                                                                                                                                                                                     | <b>S7</b>       |
| <b>Table S4</b>  | Photophysical data of <b>MD4</b>                                                                                                                                                                                                                                                                     | <b>S7</b>       |
| <b>Table S5</b>  | Photophysical data of <b>MD5</b>                                                                                                                                                                                                                                                                     | <b>S8</b>       |
| <b>Table S6</b>  | Photophysical data of <b>MD6</b>                                                                                                                                                                                                                                                                     | <b>S8</b>       |
| <b>Table S7</b>  | Comparison of experimental absorption and vertical excitation obtained by TD-DFT for <b>MD1</b>                                                                                                                                                                                                      | <b>S9</b>       |
| <b>Table S8</b>  | Comparison of experimental absorption and vertical excitation obtained by TD-DFT for <b>MD2</b>                                                                                                                                                                                                      | <b>S9</b>       |
| <b>Table S9</b>  | Comparison of experimental absorption and vertical excitation obtained by TD-DFT for <b>MD3</b>                                                                                                                                                                                                      | <b>S9</b>       |
| <b>Table S10</b> | Comparison of experimental absorption and vertical excitation obtained by TD-DFT for <b>MD4</b>                                                                                                                                                                                                      | <b>S10</b>      |
| <b>Table S11</b> | Comparison of experimental absorption and vertical excitation obtained by TD-DFT for <b>MD5</b>                                                                                                                                                                                                      | <b>S10</b>      |
| <b>Table S12</b> | Comparison of experimental absorption and vertical excitation obtained by TD-DFT for <b>MD6</b>                                                                                                                                                                                                      | <b>S11</b>      |
| <b>Table S13</b> | Ratio of dipole moment for <b>MD1-MD6</b> .                                                                                                                                                                                                                                                          | <b>S11</b>      |
| <b>Table S14</b> | Table S14: Estimated coefficients ( $\gamma_0$ , a, b, c, d), their standard errors and correlation coefficients (r) for the multi-linear analysis of ( $\bar{u}_{abs}$ ), ( $\bar{u}_{emi}$ ) and ( $\Delta\bar{u}$ ) of <b>MD1 to MD6</b> as a function of Kamlet-Taft and Catalan solvent scales. | <b>S12</b>      |
| <b>Table S15</b> | Comparative study of the photovoltaic performance for the reported rhodanine 3-acetic acid anchoring group based dyes.                                                                                                                                                                               | <b>S14</b>      |
| <b>Table S16</b> | Impedance spectroscopy fitting parameters of DSSCs sensitized with MD dye                                                                                                                                                                                                                            | <b>S15</b>      |
| <b>Figure S1</b> | Absorption and Emission spectra of <b>MD1</b>                                                                                                                                                                                                                                                        | <b>S16</b>      |
| <b>Figure S2</b> | Absorption and Emission spectra of <b>MD2</b>                                                                                                                                                                                                                                                        | <b>S16</b>      |
| <b>Figure S3</b> | Absorption and Emission spectra of <b>MD3</b>                                                                                                                                                                                                                                                        | <b>S16</b>      |
| <b>Figure S4</b> | Absorption and Emission spectra of <b>MD4</b>                                                                                                                                                                                                                                                        | <b>S17</b>      |
| <b>Figure S5</b> | Absorption and Emission spectra of <b>MD5</b>                                                                                                                                                                                                                                                        | <b>S17</b>      |
| <b>Figure S6</b> | Absorption and Emission spectra of <b>MD6</b>                                                                                                                                                                                                                                                        | <b>S17</b>      |
| <b>Figure S7</b> | Absorption spectra of <b>MD1-MD6</b> on titania film                                                                                                                                                                                                                                                 | <b>S18</b>      |
| <b>Figure S8</b> | Solvent polarity plots for <b>MD1</b>                                                                                                                                                                                                                                                                | <b>S19</b>      |
| <b>Figure S9</b> | Solvent polarity plots for <b>MD2</b>                                                                                                                                                                                                                                                                | <b>S20</b>      |

|                   |                                                           |            |
|-------------------|-----------------------------------------------------------|------------|
| <b>Figure S10</b> | Solvent polarity plots for <b>MD3</b>                     | <b>S21</b> |
| <b>Figure S11</b> | Solvent polarity plots for <b>MD4</b>                     | <b>S22</b> |
| <b>Figure S12</b> | Solvent polarity plots for <b>MD5</b>                     | <b>S23</b> |
| <b>Figure S13</b> | Solvent polarity plots for <b>MD6</b>                     | <b>S24</b> |
| <b>Figure S14</b> | Optimized geometries of <b>MD1 to MD6</b> in acetonitrile | <b>S25</b> |
| <b>Figure S15</b> | <sup>1</sup> H NMR spectrum of chromophore <b>MD1</b>     | <b>S26</b> |
| <b>Figure S16</b> | <sup>13</sup> C NMR spectrum of chromophore <b>MD1</b>    | <b>S26</b> |
| <b>Figure S17</b> | <sup>1</sup> H NMR spectrum of chromophore <b>MD2</b>     | <b>S27</b> |
| <b>Figure S18</b> | <sup>13</sup> C NMR spectrum of chromophore <b>MD2</b>    | <b>S27</b> |
| <b>Figure S19</b> | <sup>1</sup> H NMR spectrum of chromophore <b>MD3</b>     | <b>S28</b> |
| <b>Figure S20</b> | <sup>13</sup> C NMR spectrum of chromophore <b>MD3</b>    | <b>S28</b> |
| <b>Figure S21</b> | <sup>1</sup> H NMR spectrum of chromophore <b>MD4</b>     | <b>S29</b> |
| <b>Figure S22</b> | <sup>13</sup> C NMR spectrum of chromophore <b>MD4</b>    | <b>S29</b> |
| <b>Figure S23</b> | <sup>1</sup> H NMR spectrum of chromophore <b>MD5</b>     | <b>S30</b> |
| <b>Figure S24</b> | <sup>13</sup> C NMR spectrum of chromophore <b>MD5</b>    | <b>S30</b> |
| <b>Figure S25</b> | <sup>1</sup> H NMR spectrum of chromophore <b>MD6</b>     | <b>S31</b> |
| <b>Figure S26</b> | <sup>13</sup> C NMR spectrum of chromophore <b>MD6</b>    | <b>S31</b> |
| <b>Figure S27</b> | Mass Spectra of <b>MD1</b>                                | <b>S32</b> |
| <b>Figure S28</b> | Mass Spectra of <b>MD2</b>                                | <b>S33</b> |
| <b>Figure S29</b> | Mass Spectra of <b>MD3</b>                                | <b>S34</b> |
| <b>Figure S30</b> | Mass Spectra of <b>MD4</b>                                | <b>S35</b> |
| <b>Figure S31</b> | Mass Spectra of <b>MD5</b>                                | <b>S36</b> |
| <b>Figure S32</b> | Mass Spectra of <b>MD6</b>                                | <b>S37</b> |

## Synthesis:

### 2.3.1. Synthesis of aldehyde (1a-1f)

The aldehydes (1a-1f) were synthesized by using reported procedure given in literature [45,57], and were purified by using column chromatography and used for further synthesis.

### 2.3.2. Synthesis of Compound MD1-MD6

Compounds 3a-3e were synthesized by condensing 0.1 mmol of aldehyde (1a-1f) with 0.105 mmol of rhodanine-3-acetic acid in ethanol in presence of catalytic amount of piperidine. The separated solid was filtered and dried under vacuum and the compounds were purified by silica gel column chromatography using dichloromethane: methanol [9:1] as the eluent. The compounds were confirmed by using <sup>1</sup>H-NMR and <sup>13</sup>C-NMR and elemental analysis (<sup>1</sup>H-NMR spectra and <sup>13</sup>C-NMR spectra given in supporting information).

### 2.3.3. (Z)-2-(4-Oxo-5-((9-phenyl-9H-carbazol-3-yl) methylene)-2-thioxothiazolidin-3-yl) acetic acid (MD1)

<sup>1</sup>H NMR (500 MHz, DMSO-*d*<sub>6</sub>) δ 7.65 (s, 1H), 7.48 (d, *J* = 8.9 Hz, 2H), 7.39 (t, *J* = 7.9 Hz, 3H), 7.21 – 7.14 (m, 5H), 6.94 – 6.89 (m, 2H), 4.36 (s, 2H). <sup>13</sup>C NMR (126 MHz, DMSO-*d*<sub>6</sub>) δ 193.28, 168.00, 167.37, 150.22, 146.10, 132.96, 132.89, 130.41, 130.18, 126.48, 126.24, 125.61, 125.41, 120.04, 118.94, 48.21. MS, *m/z*: cal.: 444.5, found: 445.1 [*M*<sup>+</sup> + H]. CNH Analysis calculated (percent) for C<sub>24</sub>H<sub>16</sub>N<sub>2</sub>O<sub>3</sub>S<sub>2</sub>: C, 64.85; H, 3.63; N, 6.30; O, 10.80; S, 14.43. Found: C, 64.87; H, 3.63; N, 6.31.

### 2.3.4. (Z)-2-(5-(4-(Diphenylamino) benzylidene)-4-oxo-2-thioxothiazolidin-3-yl) acetic acid (MD2)

<sup>1</sup>H NMR (500 MHz, DMSO-*d*<sub>6</sub>) δ 9.33 (s, 1H), 7.66 (s, 1H), 7.50 (d, *J* = 8.7 Hz, 2H), 7.39 (t, *J* = 7.9 Hz, 4H), 7.22 – 7.14 (m, 6H), 6.92 (d, *J* = 8.8 Hz, 2H), 4.35 (s, 2H). <sup>13</sup>C NMR (126 MHz, DMSO-*d*<sub>6</sub>) δ 193.27, 167.70, 167.39, 150.21, 146.10, 132.99, 132.86, 130.42, 126.50, 125.62, 125.40, 120.04, 118.93, 48.28. MS, *m/z*: cal.: 446.5, found: 447.9 [*M*<sup>+</sup> + H]. CNH Analysis calculated (percent) for C<sub>24</sub>H<sub>18</sub>N<sub>2</sub>O<sub>3</sub>S<sub>2</sub>: C, 64.55; H, 4.06; N, 6.27; O, 10.75; S, 14.36. Found: C, 64.58; H, 4.05; N, 6.28.

### 2.3.5. (Z)-2-(5-(4-(9H-Carbazol-9-yl) benzylidene)-4-oxo-2-thioxothiazolidin-3-yl) acetic acid (MD3)

<sup>1</sup>H NMR (500 MHz, DMSO-*d*<sub>6</sub>) δ 8.22 (d, *J* = 7.5 Hz, 2H), 7.95 (s, 1H), 7.90 (d, *J* = 7.8 Hz, 2H), 7.80 (d, *J* = 7.7 Hz, 2H), 7.48 (d, *J* = 8.0 Hz, 2H), 7.42 (t, *J* = 7.3 Hz, 2H), 7.30 (t, *J* = 7.1 Hz, 2H), 4.72 (s, 2H). <sup>13</sup>C NMR (126 MHz, DMSO-*d*<sub>6</sub>) δ 193.41, 167.72, 166.89, 139.94, 139.50, 133.12, 132.99, 131.88, 127.39, 126.90, 123.63, 122.67,

121.12, 121.05, 110.30, 45.96. MS, m/z: cal.: 444.5, found: 445.1 [M<sup>+</sup>+ H]. CNH Analysis calculated (percent) for C<sub>24</sub>H<sub>16</sub>N<sub>2</sub>O<sub>3</sub>S<sub>2</sub>: C, 64.85; H, 3.63; N, 6.30; O, 10.80; S, 14.43. Found: C, 64.85; H, 3.63; N, 6.31.

2.3.6. *(Z)*-2-(5-((9-Hexyl-9H-carbazol-3-yl) methylene)-4-oxo-2-thioxothiazolidin-3-yl) acetic acid (MD4)

<sup>1</sup>H NMR (500 MHz, DMSO-*d*6) δ 8.45 (s, 1H), 8.27 (d, *J* = 7.7 Hz, 1H), 7.99 (s, 1H), 7.77 (d, *J* = 8.5 Hz, 1H), 7.71 (d, *J* = 8.8 Hz, 1H), 7.66 (d, *J* = 8.2 Hz, 1H), 7.52 (t, *J* = 7.7 Hz, 1H), 7.28 (t, *J* = 7.4 Hz, 1H), 4.57 (s, 2H), 4.42 (t, *J* = 6.8 Hz, 2H), 2.98 – 2.93 (m, 2H), 1.31 – 1.17 (m, 6H), 0.79 (t, *J* = 6.7 Hz, 3H). <sup>13</sup>C NMR (126 MHz, DMSO-*d*6) δ 193.62, 167.64, 167.19, 141.82, 141.17, 135.43, 128.97, 127.25, 124.69, 124.22, 123.43, 122.33, 121.33, 120.44, 118.32, 111.01, 110.48, 46.99, 43.92, 31.36, 28.91, 26.51, 22.43, 14.28. MS, m/z: cal.: 452.6, found: 451.5 [M<sup>+</sup>- H]. CNH Analysis calculated (percent) for C<sub>24</sub>H<sub>24</sub>N<sub>2</sub>O<sub>3</sub>S<sub>2</sub>: C, 63.69; H, 5.34; N, 6.19; O, 10.61; S, 14.17. Found: C, 63.68; H, 5.34; N, 6.20

2.3.7. *(Z)*-2-(5-(4-(Hexyl(phenyl)amino) benzylidene)-4-oxo-2-thioxothiazolidin-3-yl) acetic acid (MD5)

<sup>1</sup>H NMR (500 MHz, CDCl<sub>3</sub>) δ 7.70 (s, 1H), 7.45 (t, *J* = 7.7 Hz, 2H), 7.35 – 7.27 (m, 3H), 7.22 (d, *J* = 8.1 Hz, 2H), 6.73 (d, *J* = 8.8 Hz, 2H), 4.92 (s, 2H), 3.75 – 3.70 (m, 2H), 1.70 (dt, *J* = 15.2, 7.7 Hz, 2H), 1.37 – 1.28 (m, 6H), 0.89 (t, *J* = 6.5 Hz, 3H). <sup>13</sup>C NMR (126 MHz, CDCl<sub>3</sub>) δ 192.83, 170.60, 167.27, 150.89, 145.53, 135.33, 133.13, 130.10, 127.35, 126.42, 121.90, 115.60, 114.33, 52.67, 44.27, 31.55, 27.27, 26.62, 22.62, 14.01. MS, m/z: cal.: 454.6, found: 456.2 [M<sup>+</sup>+ H]. CNH Analysis calculated (percent) for C<sub>24</sub>H<sub>26</sub>N<sub>2</sub>O<sub>3</sub>S<sub>2</sub>: C, 63.41; H, 5.76; N, 6.16; O, 10.56; S, 14.11. Found: 63.43; H, 5.78; N, 6.15.

2.3.8. *(Z)*-2-(5-(4-(Dihexylamino) benzylidene)-4-oxo-2-thioxothiazolidin-3-yl) acetic acid (MD6)

<sup>1</sup>H NMR (500 MHz, CDCl<sub>3</sub>) δ 7.71 (s, 1H), 7.39 (d, *J* = 8.8 Hz, 2H), 6.69 (d, *J* = 9.1 Hz, 2H), 4.93 (s, 2H), 3.36 – 3.32 (m, 4H), 1.65 – 1.59 (m, 4H), 1.34 (t, *J* = 6.8 Hz, 12H), 0.91 (t, *J* = 6.4 Hz, 6H). <sup>13</sup>C NMR (126 MHz, CDCl<sub>3</sub>) δ 192.86, 169.88, 167.32, 135.70, 133.69, 114.07, 111.95, 111.88, 111.82, 51.25, 44.29, 31.62, 27.17, 26.71, 22.64, 14.03. MS, m/z: cal.: 462.7, found: 464.3 [M<sup>+</sup>+ H]. CNH Analysis calculated (percent) for C<sub>24</sub>H<sub>34</sub>N<sub>2</sub>O<sub>3</sub>S<sub>2</sub>: C, 62.30; H, 7.41; N, 6.05; O, 10.37; S, 13.86. Found: C, 62.30; H, 7.42; N, 6.06.

**Table S1** Photophysical data of **MD1**.

| <b>Solvents</b>     | $\lambda_{\text{abs}}$ |                      | $\lambda_{\text{ems}}$ |                      | $\epsilon_{\text{max}}$ | <b>Stokes shift</b> |                      | <b>FWHM</b> | <b>f</b> |
|---------------------|------------------------|----------------------|------------------------|----------------------|-------------------------|---------------------|----------------------|-------------|----------|
|                     | (nm)                   | ( $\text{cm}^{-1}$ ) | (nm)                   | ( $\text{cm}^{-1}$ ) |                         | (nm)                | ( $\text{cm}^{-1}$ ) |             |          |
| <b>MDC</b>          | 446                    | 22421.5              | 528                    | 18939.4              | 25000                   | 82                  | 3482.13              | 66          | 0.465    |
| <b>THF</b>          | 434                    | 23041.5              | 491                    | 20366.6              | 21400                   | 57                  | 2674.88              | 59          | 0.386    |
| <b>EA</b>           | 433                    | 23094.7              | 488                    | 20491.8              | 14200                   | 55                  | 2602.88              | 60          | 0.261    |
| <b>1,4-Dioxane</b>  | 434                    | 23041.5              | 482                    | 20746.9              | 20000                   | 48                  | 2294.59              | 60          | 0.367    |
| <b>Acetone</b>      | 434                    | 23041.5              | 513                    | 19493.2              | 14800                   | 79                  | 3548.30              | 68          | 0.199    |
| <b>Acetonitrile</b> | 437                    | 22883.3              | 523                    | 19120.5              | 17200                   | 86                  | 3762.84              | 168         | 0.348    |
| <b>DMF</b>          | 430                    | 23255.8              | 505                    | 19802.0              | 19400                   | 75                  | 3453.83              | 61          | 0.361    |
| <b>DMSO</b>         | 442                    | 22624.43             | 528                    | 18939.4              | 21600                   | 86                  | 3685.04              | 62          | 0.386    |
| <b>Ethanol</b>      | 434                    | 23041.47             | 502                    | 19920.3              | 14200                   | 68                  | 3121.16              | 66          | 0.263    |

**Table S2** Photophysical properties of **MD2**.

| <b>Solvents</b>     | $\lambda_{\text{abs}}$ |                      | $\lambda_{\text{ems}}$ |                      | $\epsilon_{\text{max}}$ | <b>Stokes shift</b> |                      | <b>FWHM</b> | <b>f</b> |
|---------------------|------------------------|----------------------|------------------------|----------------------|-------------------------|---------------------|----------------------|-------------|----------|
|                     | (nm)                   | ( $\text{cm}^{-1}$ ) | (nm)                   | ( $\text{cm}^{-1}$ ) |                         | (nm)                | ( $\text{cm}^{-1}$ ) |             |          |
| <b>MDC</b>          | 479                    | 20876.8              | 603                    | 16583.7              | 26000                   | 124                 | 4293.08              | 71          | 0.440    |
| <b>THF</b>          | 461                    | 21692.0              | 549                    | 18214.9              | 29400                   | 88                  | 3477.04              | 64          | 0.513    |
| <b>EA</b>           | 465                    | 21505.4              | 567                    | 17636.7              | 26800                   | 102                 | 3868.69              | 65          | 0.477    |
| <b>1,4-Dioxane</b>  | 467                    | 21413.3              | 544                    | 18382.4              | 29400                   | 77                  | 3030.92              | 64          | 0.519    |
| <b>Acetone</b>      | 466                    | 21459.2              | 593                    | 16863.4              | 22600                   | 127                 | 4595.82              | 66          | 0.391    |
| <b>Acetonitrile</b> | 468                    | 21367.5              | 523                    | 19120.5              | 21600                   | 55                  | 2247.06              | 71          | 0.394    |
| <b>DMF</b>          | 466                    | 21459.2              | 597                    | 16750.4              | 21000                   | 131                 | 4708.81              | 67          | 0.385    |
| <b>DMSO</b>         | 475                    | 21052.63             | 616                    | 16233.8              | 23000                   | 141                 | 4818.87              | 72          | 0.381    |
| <b>Ethanol</b>      | 469                    | 21321.96             | 582                    | 17182.1              | 18600                   | 113                 | 4139.83              | 67          | 0.328    |

**Table S3** Photophysical properties of **MD3**.

| <b>Solvents</b>     | $\lambda_{\text{abs}}$ |                      | $\lambda_{\text{ems}}$ |                      | $\epsilon_{\text{max}}$ | <b>Stokes shift</b> |                      | <b>FWHM</b> | <b>f</b> |
|---------------------|------------------------|----------------------|------------------------|----------------------|-------------------------|---------------------|----------------------|-------------|----------|
|                     | (nm)                   | ( $\text{cm}^{-1}$ ) | (nm)                   | ( $\text{cm}^{-1}$ ) |                         | (nm)                | ( $\text{cm}^{-1}$ ) |             |          |
| <b>MDC</b>          | 427                    | 23419.2              | 571                    | 17513.1              | 21400                   | 144                 | 5906.07              | 69          | 0.486    |
| <b>THF</b>          | 418                    | 23923.4              | 533                    | 18761.7              | 23200                   | 115                 | 5161.72              | 111         | 0.581    |
| <b>EA</b>           | 417                    | 23980.8              | 533                    | 18761.7              | 22400                   | 116                 | 5219.09              | 110         | 0.564    |
| <b>Dioxane</b>      | 419                    | 23866.3              | 508                    | 19685.0              | 24000                   | 89                  | 4181.31              | 110         | 0.588    |
| <b>Acetone</b>      | 416                    | 24038.5              | 582                    | 17182.1              | 21200                   | 166                 | 6856.33              | 109         | 0.539    |
| <b>Acetonitrile</b> | 401                    | 24937.7              | 586                    | 17064.8              | 15200                   | 185                 | 7872.81              | 109         | 0.387    |
| <b>DMF</b>          | 401                    | 24937.7              | 566                    | 17667.8              | 26200                   | 165                 | 7269.81              | 103         | 0.626    |
| <b>DMSO</b>         | 423                    | 23640.66             | 599                    | 16694.5              | 21600                   | 176                 | 6946.17              | 118         | 0.569    |
| <b>Ethanol</b>      | 401                    | 24937.66             | 561                    | 17825.3              | 26400                   | 160                 | 7112.34              | 103         | 0.632    |

**Table S4** Photophysical properties of **MD4**.

| <b>Solvents</b>     | $\lambda_{\text{abs}}$ |                      | $\lambda_{\text{ems}}$ |                      | $\epsilon_{\text{max}}$ | <b>Stokes shift</b> |                      | <b>FWHM</b> | <b>f</b> |
|---------------------|------------------------|----------------------|------------------------|----------------------|-------------------------|---------------------|----------------------|-------------|----------|
|                     | (nm)                   | ( $\text{cm}^{-1}$ ) | (nm)                   | ( $\text{cm}^{-1}$ ) |                         | (nm)                | ( $\text{cm}^{-1}$ ) |             |          |
| <b>MDC</b>          | 451                    | 22172.9              | 516                    | 19379.8              | 31000                   | 65                  | 2793.10              | 63          | 0.517    |
| <b>THF</b>          | 440                    | 22727.3              | 495                    | 20202.0              | 29400                   | 55                  | 2525.25              | 161         | 0.516    |
| <b>EA</b>           | 439                    | 22779.0              | 495                    | 20202.0              | 29800                   | 56                  | 2577.02              | 59          | 0.529    |
| <b>Dioxane</b>      | 438                    | 22831.1              | 488                    | 20491.8              | 28800                   | 50                  | 2339.25              | 58          | 0.493    |
| <b>Acetone</b>      | 441                    | 22675.7              | 516                    | 19379.8              | 26000                   | 75                  | 3295.89              | 62          | 0.478    |
| <b>Acetonitrile</b> | 438                    | 22831.1              | 524                    | 19084.0              | 23600                   | 86                  | 3747.08              | 66          | 0.460    |
| <b>DMF</b>          | 437                    | 22883.3              | 515                    | 19417.5              | 27600                   | 78                  | 3465.82              | 61          | 0.498    |
| <b>DMSO</b>         | 452                    | 22123.9              | 535                    | 18691.6              | 28800                   | 83                  | 3432.31              | 66          | 0.545    |
| <b>Ethanol</b>      | 431                    | 23201.9              | 521                    | 19193.9              | 26000                   | 90                  | 4008.00              | 64          | 0.495    |

**Table S5** Photophysical properties of **MD5**.

| <b>Solvents</b>     | $\lambda_{\text{abs}}$ |                      | $\lambda_{\text{ems}}$ |                      | $\epsilon_{\text{max}}$ | <b>Stokes shift</b> |                      | <b>FWHM</b> | <b>f</b> |
|---------------------|------------------------|----------------------|------------------------|----------------------|-------------------------|---------------------|----------------------|-------------|----------|
|                     | (nm)                   | ( $\text{cm}^{-1}$ ) | (nm)                   | ( $\text{cm}^{-1}$ ) |                         | (nm)                | ( $\text{cm}^{-1}$ ) |             |          |
| <b>MDC</b>          | 478                    | 20920.5              | 556                    | 17985.6              | 75200                   | 78                  | 2934.89              | 60          | 1.418    |
| <b>THF</b>          | 464                    | 21551.7              | 542                    | 18450.2              | 82800                   | 78                  | 3101.54              | 60          | 1.667    |
| <b>EA</b>           | 462                    | 21645.0              | 542                    | 18450.2              | 66200                   | 80                  | 3194.84              | 60          | 1.317    |
| <b>Dioxane</b>      | 462                    | 21645.0              | 540                    | 18518.5              | 64000                   | 78                  | 3126.50              | 60          | 1.288    |
| <b>Acetone</b>      | 466                    | 21459.2              | 551                    | 18148.8              | 61200                   | 85                  | 3310.41              | 62          | 0.991    |
| <b>Acetonitrile</b> | 464                    | 21551.7              | 559                    | 17889.1              | 53400                   | 95                  | 3662.64              | 64          | 1.086    |
| <b>DMF</b>          | 466                    | 21459.2              | 554                    | 18050.5              | 64600                   | 88                  | 3408.69              | 64          | 1.366    |
| <b>DMSO</b>         | 480                    | 20833.3              | 571                    | 17513.1              | 57200                   | 91                  | 3320.20              | 66          | 1.199    |
| <b>Ethanol</b>      | 462                    | 21645.0              | 564                    | 17730.5              | 61800                   | 102                 | 3914.53              | 66          | 1.339    |

**Table S6** Photophysical properties of **MD6**.

| <b>Solvents</b>     | $\lambda_{\text{abs}}$ |                      | $\lambda_{\text{ems}}$ |                      | $\epsilon_{\text{max}}$ | <b>Stokes shift</b> |                      | <b>FWHM</b> | <b>f</b> |
|---------------------|------------------------|----------------------|------------------------|----------------------|-------------------------|---------------------|----------------------|-------------|----------|
|                     | (nm)                   | ( $\text{cm}^{-1}$ ) | (nm)                   | ( $\text{cm}^{-1}$ ) |                         | (nm)                | ( $\text{cm}^{-1}$ ) |             |          |
| <b>MDC</b>          | 488                    | 20491.8              | 534                    | 18726.6              | 65600                   | 46                  | 1765.21              | 60          | 1.157    |
| <b>THF</b>          | 476                    | 21008.4              | 512                    | 19531.3              | 66400                   | 36                  | 1477.15              | 66          | 1.666    |
| <b>EA</b>           | 474                    | 21097.0              | 515                    | 19417.5              | 68600                   | 41                  | 1679.57              | 66          | 1.520    |
| <b>Dioxane</b>      | 472                    | 21186.4              | 512                    | 19531.3              | 56400                   | 40                  | 1655.19              | 56          | 0.925    |
| <b>Acetone</b>      | 480                    | 20833.3              | 553                    | 18083.2              | 59800                   | 73                  | 2750.15              | 60          | 0.888    |
| <b>Acetonitrile</b> | 480                    | 20833.3              | 561                    | 17825.3              | 54200                   | 81                  | 3008.02              | 64          | 1.028    |
| <b>DMF</b>          | 480                    | 20833.3              | 553                    | 18083.2              | 39800                   | 73                  | 2750.15              | 62          | 0.622    |
| <b>DMSO</b>         | 496                    | 20161.3              | 571                    | 17513.1              | 50800                   | 75                  | 2648.16              | 64          | 0.731    |
| <b>Ethanol</b>      | 470                    | 21276.6              | 553                    | 18083.2              | 53200                   | 83                  | 3193.41              | 66          | 1.032    |



**Table S7:** Comparison of experimental absorption and vertical excitation obtained by TD-DFT for MD1

| Solvent      | Absorption | Vertical Excitation | Oscillator Strength | Orbital Contribution |
|--------------|------------|---------------------|---------------------|----------------------|
|              | nm         | nm                  |                     |                      |
| MDC          | 446        | 458                 | 1.0176              | 99.3                 |
| THF          | 434        | 457                 | 1.0133              | 99.2                 |
| EA           | 433        | 455                 | 1.0048              | 99.2                 |
| 1,4-Dioxane  | 434        | 447                 | 1.0490              | 99.3                 |
| Acetone      | 434        | 459                 | 0.9877              | 99.2                 |
| Acetonitrile | 437        | 459                 | 0.9799              | 99.2                 |
| DMF          | 430        | 462                 | 1.0109              | 99.3                 |
| DMSO         | 442        | 462                 | 1.0057              | 99.2                 |
| Ethanol      | 434        | 459                 | 0.9877              | 99.2                 |

**Table S8:** Comparison of experimental absorption and vertical excitation obtained by TD-DFT for MD2

| Solvent      | Absorption | Vertical Excitation | Oscillator Strength | Orbital Contribution |
|--------------|------------|---------------------|---------------------|----------------------|
|              | nm         | nm                  |                     |                      |
| MDC          | 479        | 514                 | 1.0508              | 99.5                 |
| THF          | 461        | 512                 | 1.0450              | 99.5                 |
| EA           | 465        | 510                 | 1.0352              | 99.5                 |
| 1,4-Dioxane  | 467        | 501                 | 1.0433              | 99.4                 |
| Acetone      | 466        | 514                 | 1.0355              | 99.5                 |
| Acetonitrile | 468        | 514                 | 1.0325              | 99.5                 |
| DMF          | 466        | 517                 | 1.0563              | 99.5                 |
| DMSO         | 475        | 517                 | 1.0532              | 99.5                 |
| Ethanol      | 469        | 514                 | 1.0366              | 99.5                 |

**Table S9:** Comparison of experimental absorption and vertical excitation obtained by TD-DFT for MD3

| Solvent     | Absorption | Vertical Excitation | Oscillator Strength | Orbital Contribution |
|-------------|------------|---------------------|---------------------|----------------------|
|             | nm         | nm                  |                     |                      |
| MDC         | 427        | 526                 | 0.5536              | 99.2                 |
| THF         | 418        | 524                 | 0.5463              | 99.2                 |
| EA          | 417        | 524                 | 0.5383              | 99.2                 |
| 1,4-Dioxane | 419        | 526                 | 0.5479              | 99.2                 |

|              |     |     |        |      |
|--------------|-----|-----|--------|------|
| Acetone      | 416 | 522 | 0.5383 | 99.2 |
| Acetonitrile | 401 | 521 | 0.5357 | 99.2 |
| DMF          | 401 | 523 | 0.5554 | 99.2 |
| DMSO         | 423 | 522 | 0.5529 | 99.2 |
| Ethanol      | 401 | 521 | 0.5318 | 99.2 |

**Table S10:** Comparison of experimental absorption and vertical excitation obtained by TD-DFT for **MD4**

| Solvent      | Absorption | Vertical Excitation | Oscillator Strength | Orbital Contribution |
|--------------|------------|---------------------|---------------------|----------------------|
|              | nm         | nm                  |                     |                      |
| MDC          | 451        | 463                 | 1.0035              | 99.3                 |
| THF          | 440        | 461                 | 0.9990              | 99.3                 |
| EA           | 439        | 459                 | 0.9903              | 99.2                 |
| 1,4-Dioxane  | 438        | 449                 | 1.0341              | 99.3                 |
| Acetone      | 441        | 464                 | 0.9737              | 99.2                 |
| Acetonitrile | 438        | 464                 | 0.9659              | 99.2                 |
| DMF          | 437        | 467                 | 0.9974              | 99.3                 |
| DMSO         | 452        | 467                 | 0.9922              | 99.3                 |
| Ethanol      | 431        | 464                 | 0.9739              | 99.2                 |

**Table S11:** Comparison of experimental absorption and vertical excitation obtained by TD-DFT for **MD5**

| Solvent      | Absorption | Vertical Excitation | Oscillator Strength | Orbital Contribution |
|--------------|------------|---------------------|---------------------|----------------------|
|              | nm         | nm                  |                     |                      |
| MDC          | 478        | 471                 | 1.1507              | 99.5                 |
| THF          | 464        | 473                 | 1.1414              | 99.5                 |
| EA           | 462        | 470                 | 1.1332              | 99.5                 |
| 1,4-Dioxane  | 462        | 462                 | 1.1450              | 99.4                 |
| Acetone      | 466        | 475                 | 1.1300              | 99.5                 |
| Acetonitrile | 464        | 476                 | 1.1261              | 99.5                 |
| DMF          | 466        | 479                 | 1.1481              | 99.5                 |
| DMSO         | 480        | 479                 | 1.1449              | 99.5                 |
| Ethanol      | 462        | 475                 | 1.1218              | 99.5                 |

**Table S12** Comparison of experimental absorption and vertical excitation obtained by TD-DFT for **MD6**

| Solvent      | Absorption | Vertical Excitation | Oscillator Strength | Orbital Contribution |
|--------------|------------|---------------------|---------------------|----------------------|
|              | nm         | nm                  |                     |                      |
| MDC          | 488        | 474                 | 0.8621              | 99.2                 |
| THF          | 476        | 473                 | 0.8538              | 99.2                 |
| EA           | 474        | 471                 | 0.8408              | 99.1                 |
| 1,4-Dioxane  | 472        | 466                 | 0.8346              | 98.8                 |
| Acetone      | 480        | 474                 | 0.8554              | 99.3                 |
| Acetonitrile | 480        | 474                 | 0.8554              | 99.3                 |
| DMF          | 480        | 477                 | 0.8794              | 99.4                 |
| DMSO         | 496        | 477                 | 0.8771              | 99.4                 |
| Ethanol      | 470        | 475                 | 0.8578              | 99.3                 |

**Table S13** Ratio of dipole moment for **MD1-MD6**.

| Molecule |                       | m1                     | m2      | m1+m2   | m2-m1  | $\mu\epsilon/\mu\text{g}$ |
|----------|-----------------------|------------------------|---------|---------|--------|---------------------------|
| MD1      | Bilot Kawski Function | 1876.4                 | 2257.0  | 4133.4  | 380.6  | 10.9                      |
|          | Bakhshiev Function    | 1876.4                 | 2261.2  | 4137.6  | 384.8  | 10.8                      |
|          | Liptay Function       | 2231.0                 | 2808.2  | 5039.2  | 577.2  | 8.7                       |
| MD2      | Bilot Kawski Function | 2302.7                 | 2783.0  | 5085.7  | 480.3  | 10.6                      |
|          | Bakhshiev Function    | 2302.7                 | 2779.0  | 5081.7  | 476.3  | 10.7                      |
|          | Liptay Function       | 2853.1                 | 3434.1  | 6287.2  | 581.0  | 10.8                      |
| MD3      | Bilot Kawski Function | Linearity Not Observed |         |         |        |                           |
|          | Bakhshiev Function    | 4257.8                 | 8688.8  | 12946.6 | 4431.0 | 2.9                       |
|          | Liptay Function       | Linearity Not Observed |         |         |        |                           |
| MD4      | Bilot Kawski Function | 1821.9                 | 2357.4  | 4179.3  | 535.5  | 7.8                       |
|          | Bakhshiev Function    | 1821.9                 | 6315.4  | 8137.3  | 4493.5 | 1.8                       |
|          | Liptay Function       | 2265.8                 | 2724.5  | 4990.3  | 458.7  | 10.9                      |
| MD5      | Bilot Kawski Function | 1005.8                 | 1394.3  | 2400.1  | 388.5  | 6.2                       |
|          | Bakhshiev Function    | 1268.3                 | 7074.0  | 8342.3  | 5805.7 | 1.4                       |
|          | Liptay Function       | Linearity Not Observed |         |         |        |                           |
| MD6      | Bilot Kawski Function | 2847.2                 | 3977.9  | 6825.1  | 1130.7 | 6.0                       |
|          | Bakhshiev Function    | 2847.2                 | 11288.0 | 14135.2 | 8440.8 | 1.7                       |
|          | Liptay Function       | 3779.6                 | 4170.6  | 2617.1  | 801.3  | 3.3                       |

**Table S14:** Estimated coefficients ( $y_0$ ,  $a$ ,  $b$ ,  $c$ ,  $d$ ), their standard errors and correlation coefficients ( $r$ ) for the multi-linear analysis of ( $\bar{\nu}_{\text{abs}}$ ), ( $\bar{\nu}_{\text{emi}}$ ) and ( $\Delta\bar{\nu}$ ) of **MD1 to MD6** as a function of Kamlet-Taft and Catalan solvent scales.

| <b>MD1</b>                         |                    |                    |                    |                    |                    |          |
|------------------------------------|--------------------|--------------------|--------------------|--------------------|--------------------|----------|
| <b>Kamlet-Taft</b>                 | $y_0 \times 10^3$  | $a\alpha$          | $b\beta$           | $c\pi^*$           | <b>r</b>           |          |
| $\nu_{\text{abs}}(\text{cm}^{-1})$ | $23.37 \pm 0.35$   | $(-0.35) \pm 0.29$ | $0.78 \pm 0.36$    | $(-1.09) \pm 0.47$ | 0.61               |          |
| $\nu_{\text{emi}}(\text{cm}^{-1})$ | $22.27 \pm 0.50$   | $(-1.27) \pm 0.41$ | $1.25 \pm 0.51$    | $(-4.18) \pm 0.67$ | 0.88               |          |
| $\nu_0(\text{cm}^{-1})$            | $1.09 \pm 0.53$    | $0.92 \pm 0.44$    | $(-0.45) \pm 0.54$ | $3.08 \pm 0.71$    | 0.79               |          |
| <b>Catalan</b>                     | $y_0 \times 10^3$  | $aSA$              | $bSB$              | $cSPP$             | $dSP$              | <b>r</b> |
| $\nu_{\text{abs}}(\text{cm}^{-1})$ | $24.44 \pm 0.84$   | $(-0.79) \pm 0.61$ | $1.19 \pm 0.43$    | $(-0.61) \pm 0.87$ | $(-2.13) \pm 1.16$ | 0.74     |
| $\nu_{\text{emi}}(\text{cm}^{-1})$ | $25.00 \pm 0.91$   | $(-1.12) \pm 0.65$ | $2.49 \pm 0.47$    | $(-6.94) \pm 0.95$ | $(-0.57) \pm 1.26$ | 0.95     |
| $\nu_0(\text{cm}^{-1})$            | $(-0.56) \pm 0.77$ | $0.32 \pm 0.55$    | $(-1.31) \pm 0.39$ | $6.33 \pm 0.80$    | $(-1.56) \pm 1.06$ | 0.94     |
| <b>MD2</b>                         |                    |                    |                    |                    |                    |          |
| <b>Kamlet-Taft</b>                 | $y_0 \times 10^3$  | $a\alpha$          | $b\beta$           | $c\pi^*$           | <b>r</b>           |          |
| $\nu_{\text{abs}}(\text{cm}^{-1})$ | $21.99 \pm 0.27$   | $(-0.51) \pm 0.23$ | $0.65 \pm 0.28$    | $(-1.26) \pm 0.36$ | 0.74               |          |
| $\nu_{\text{emi}}(\text{cm}^{-1})$ | $20.20 \pm 0.76$   | $(-1.26) \pm 0.63$ | $0.60 \pm 0.78$    | $(-4.49) \pm 1.02$ | 0.79               |          |
| $\nu_0(\text{cm}^{-1})$            | $1.79 \pm 0.88$    | $0.74 \pm 0.73$    | $0.05 \pm 0.91$    | $3.23 \pm 1.17$    | 0.62               |          |
| <b>Catalan</b>                     | $y_0 \times 10^3$  | $aSA$              | $bSB$              | $cSPP$             | $dSP$              | <b>r</b> |
| $\nu_{\text{abs}}(\text{cm}^{-1})$ | $23.08 \pm 0.61$   | $(-1.19) \pm 0.44$ | $1.08 \pm 0.31$    | $(-0.58) \pm 0.64$ | $(-2.38) \pm 0.85$ | 0.84     |
| $\nu_{\text{emi}}(\text{cm}^{-1})$ | $23.02 \pm 2.09$   | $(-0.65) \pm 1.50$ | $1.49 \pm 1.08$    | $(-8.41) \pm 2.19$ | $0.97 \pm 2.89$    | 0.82     |
| $\nu_0(\text{cm}^{-1})$            | $0.059 \pm 1.66$   | $(-0.54) \pm 1.19$ | $(-0.41) \pm 0.85$ | $7.83 \pm 1.73$    | $(-3.35) \pm 2.29$ | 0.83     |
| <b>MD3</b>                         |                    |                    |                    |                    |                    |          |
| <b>Kamlet-Taft</b>                 | $y_0 \times 10^3$  | $a\alpha$          | $b\beta$           | $c\pi^*$           | <b>r</b>           |          |
| $\nu_{\text{abs}}(\text{cm}^{-1})$ | $23.67 \pm 1.03$   | $0.84 \pm 0.85$    | $0.98 \pm 1.06$    | $(-0.13) \pm 1.37$ | 0.37               |          |
| $\nu_{\text{emi}}(\text{cm}^{-1})$ | $21.79 \pm 1.03$   | $(-1.68) \pm 0.85$ | $0.35 \pm 1.06$    | $(-5.41) \pm 1.37$ | 0.76               |          |
| $\nu_0(\text{cm}^{-1})$            | $1.87 \pm 1.58$    | $2.53 \pm 1.31$    | $0.64 \pm 1.63$    | $5.27 \pm 2.11$    | 0.65               |          |
| <b>Catalan</b>                     | $y_0 \times 10^3$  | $aSA$              | $bSB$              | $cSPP$             | $dSP$              | <b>r</b> |

|                                    |                   |                             |                            |                            |                    |          |
|------------------------------------|-------------------|-----------------------------|----------------------------|----------------------------|--------------------|----------|
| $\nu_{\text{abs}}(\text{cm}^{-1})$ | $25.54 \pm 2.71$  | $0.92 \pm 1.94$             | $0.59 \pm 1.39$            | $2.23 \pm 2.82$            | $(-5.13) \pm 3.73$ | 0.48     |
| $\nu_{\text{emi}}(\text{cm}^{-1})$ | $25.08 \pm 1.46$  | $(-0.81) \pm 1.05$          | $1.71 \pm 0.75$            | $(-11.71) \pm 1.52$        | $3.03 \pm 2.01$    | 0.94     |
| $\nu_0(\text{cm}^{-1})$            | $0.46 \pm 2.52$   | $1.74 \pm 1.81$             | $(-1.11) \pm 1.30$         | $13.93 \pm 2.63$           | $(-8.16) \pm 3.48$ | 0.89     |
| <b>MD4</b>                         |                   |                             |                            |                            |                    |          |
| <b>Kamlet-Taft</b>                 | $y_0 \times 10^3$ | <b>a<math>\alpha</math></b> | <b>b<math>\beta</math></b> | <b>c<math>\pi^*</math></b> | <b>r</b>           |          |
| $\nu_{\text{abs}}(\text{cm}^{-1})$ | $23.33 \pm 0.44$  | $0.07 \pm 0.36$             | $0.53 \pm 0.45$            | $(-1.32) \pm 0.58$         |                    | 0.6      |
| $\nu_{\text{emi}}(\text{cm}^{-1})$ | $22.16 \pm 0.42$  | $(-1.37) \pm 0.35$          | $(-0.02) \pm 0.43$         | $(-3.38) \pm 0.56$         |                    | 0.9      |
| $\nu_0(\text{cm}^{-1})$            | $1.18 \pm 0.60$   | $1.44 \pm 0.50$             | $0.56 \pm 0.62$            | $2.05 \pm 0.80$            |                    | 0.76     |
| <b>Catalan</b>                     | $y_0 \times 10^3$ | <b>aSA</b>                  | <b>bSB</b>                 | <b>cSPP</b>                | <b>dSP</b>         | <b>r</b> |
| $\nu_{\text{abs}}(\text{cm}^{-1})$ | $25.29 \pm 1.09$  | $0.04 \pm 0.79$             | $0.75 \pm 0.56$            | $(-1.09) \pm 1.14$         | $(-2.88) \pm 1.51$ | 0.7      |
| $\nu_{\text{emi}}(\text{cm}^{-1})$ | $24.46 \pm 1.03$  | $(-1.80) \pm 0.74$          | $1.01 \pm 0.53$            | $(-6.34) \pm 1.08$         | $0.28 \pm 1.42$    | 0.93     |
| $\nu_0(\text{cm}^{-1})$            | $0.83 \pm 1.38$   | $1.84 \pm 0.99$             | $(-0.27) \pm 0.71$         | $5.24 \pm 1.44$            | $(-3.15) \pm 1.90$ | 0.85     |
| <b>MD5</b>                         |                   |                             |                            |                            |                    |          |
| <b>Kamlet-Taft</b>                 | $y_0 \times 10^3$ | <b>a<math>\alpha</math></b> | <b>b<math>\beta</math></b> | <b>c<math>\pi^*</math></b> | <b>r</b>           |          |
| $\nu_{\text{abs}}(\text{cm}^{-1})$ | $22.42 \pm 0.36$  | $(-0.16) \pm 0.29$          | $0.41 \pm 0.37$            | $(-1.68) \pm 0.47$         |                    | 0.73     |
| $\nu_{\text{emi}}(\text{cm}^{-1})$ | $19.57 \pm 0.19$  | $(-0.88) \pm 0.16$          | $(-0.14) \pm 0.20$         | $(-1.83) \pm 0.26$         |                    | 0.94     |
| $\nu_0(\text{cm}^{-1})$            | $2.85 \pm 0.34$   | $0.73 \pm 0.28$             | $0.55 \pm 0.35$            | $0.15 \pm 0.45$            |                    | 0.74     |
| <b>Catalan</b>                     | $y_0 \times 10^3$ | <b>aSA</b>                  | <b>bSB</b>                 | <b>cSPP</b>                | <b>dSP</b>         | <b>r</b> |
| $\nu_{\text{abs}}(\text{cm}^{-1})$ | $24.65 \pm 0.76$  | $(-0.43) \pm 0.54$          | $0.76 \pm 0.39$            | $(-1.61) \pm 0.79$         | $(-3.09) \pm 1.04$ | 0.85     |
| $\nu_{\text{emi}}(\text{cm}^{-1})$ | $21.07 \pm 0.63$  | $(-1.64) \pm 0.45$          | $0.51 \pm 0.33$            | $(-2.89) \pm 0.66$         | $(-0.88) \pm 0.87$ | 0.92     |
| $\nu_0(\text{cm}^{-1})$            | $3.57 \pm 0.89$   | $1.22 \pm 0.64$             | $0.26 \pm 0.46$            | $1.28 \pm 0.92$            | $(-2.20) \pm 1.23$ | 0.78     |
| <b>MD6</b>                         |                   |                             |                            |                            |                    |          |
| <b>Kamlet-Taft</b>                 | $y_0 \times 10^3$ | <b>a<math>\alpha</math></b> | <b>b<math>\beta</math></b> | <b>c<math>\pi^*</math></b> | <b>r</b>           |          |
| $\nu_{\text{abs}}(\text{cm}^{-1})$ | $22.09 \pm 0.28$  | $0.05 \pm 0.23$             | $0.25 \pm 0.29$            | $(-1.93) \pm 0.37$         |                    | 0.86     |
| $\nu_{\text{emi}}(\text{cm}^{-1})$ | $21.87 \pm 0.73$  | $(-1.53) \pm 0.61$          | $(-0.53) \pm 0.75$         | $(-4.03) \pm 0.97$         |                    | 0.82     |
| $\nu_0(\text{cm}^{-1})$            | $0.23 \pm 0.83$   | $1.59 \pm 0.69$             | $0.78 \pm 0.86$            | $2.09 \pm 1.12$            |                    | 0.67     |

| Catalan                          | $y_0 \times 10^3$ | aSA                | bSB                | cSPP               | dSP                | r    |
|----------------------------------|-------------------|--------------------|--------------------|--------------------|--------------------|------|
| $v_{\text{abs}}(\text{cm}^{-1})$ | $24.51 \pm 0.68$  | $0.29 \pm 0.49$    | $0.63 \pm 0.35$    | $(-2.68) \pm 0.71$ | $(-2.35) \pm 0.94$ | 0.91 |
| $v_{\text{emi}}(\text{cm}^{-1})$ | $24.18 \pm 2.23$  | $(-1.65) \pm 1.60$ | $0.67 \pm 1.15$    | $(-8.17) \pm 2.33$ | $1.67 \pm 3.07$    | 0.8  |
| $v_0(\text{cm}^{-1})$            | $0.33 \pm 2.25$   | $1.95 \pm 1.62$    | $(-0.04) \pm 1.16$ | $5.49 \pm 2.35$    | $(-4.02) \pm 3.01$ | 0.72 |

**Table S15.** Comparative study of the photovoltaic performance for the reported rhodanine 3-acetic acid anchoring group based dyes.

| Dye    | $J_{\text{sc}}$ (mA cm <sup>-2</sup> ) | $V_{\text{oc}}$ (V) | FF (%) | PCE (%) | Ref. |
|--------|----------------------------------------|---------------------|--------|---------|------|
| JY04   | 5.89                                   | 0.582               | 0.72   | 2.47    | S1   |
| JY05   | 8.33                                   | 0.617               | 0.70   | 3.60    |      |
| CAR-R9 | 8.26                                   | 0.722               | 0.73   | 4.35    | S2   |
| TPA-R9 | 6.75                                   | 0.710               | 0.74   | 3.58    |      |
| J-R9   | 4.48                                   | 0.661               | 0.72   | 2.16    |      |
| 3      | 3.94                                   | 0.53                | 0.74   | 1.59    | S3   |
| 7a     | 2.06                                   | 0.47                | 0.47   | 0.72    |      |
| MD-153 | 13.5                                   | 0.72                | 0.42   | 4.0     | S4   |
| B18    | 5.40                                   | 0.669               | 0.71   | 2.56    | S5   |
| CPTD-R | 3.87                                   | 0.657               | 0.71   | 1.82    |      |
| BYD-R  | 2.44                                   | 0.590               | 0.68   | 0.97    |      |
| DB-2   | 1.34                                   | 0.576               | 0.66   | 0.51    | S6   |
| SK2    | 7.1                                    | 0.534               | 0.53   | 2.0     | S7   |
| MC3    | 8.62                                   | 0.626               | 0.66   | 3.79    | S8   |
| MC4    | 11.18                                  | 0.637               | 0.65   | 4.60    |      |
| WHB-2  | 3.33                                   | 0.58                | 0.73   | 1.41    | S9   |
| WHB-4  | 4.03                                   | 0.60                | 0.73   | 1.77    |      |
| WHB-6  | 3.41                                   | 0.56                | 0.73   | 1.39    |      |
| C-RA   | 2.83                                   | 0.472               | 0.68   | 0.90    | S10  |

#### References

- S1 X. Qian, L. Lu, Y. Zhu, H. Gao and J. Zheng, *Dye. Pigment.*, 2015, **113**, 737–742.
- S2 K. Avhad, M. Jadhav, D. Patil, T. H. Chowdhury, A. Islam, I. Bedja and N. Sekar, *Org. Electron.*, 2019, **65**, 386–393.
- S3 C. A. Echeverry, M. Á. Herranz, A. Ortiz, B. Insuasty and N. Martín, *New J. Chem.*, 2014, **38**, 5801–5807.
- S4 M. Suzuka, N. Hayashi, T. Sekiguchi, K. Sumioka, M. Takata, N. Hayo, H. Ikeda, K. Oyaizu and H. Nishide, *Sci. Rep.*, 2016, **6**, 28022.
- S5 G. S. Selopal, H.-P. Wu, J. Lu, Y.-C. Chang, M. Wang, A. Vomiero, I. Concina and E. W.-G. Diau, *Sci. Rep.*, 2016, **6**, 18756.
- S6 Z. Wan, L. Zhou, C. Jia, X. Chen, Z. Li and X. Yao, *Synth. Met.*, 2014, **196**, 193–198.
- S7 S. S. Soni, K. B. Fadadu, J. V. Vaghasiya, B. G. Solanki, K. K. Sonigara, A. Singh, D. Das and P. K. Iyer, *J. Mater. Chem. A*, 2015, **3**, 21664–21671.
- S8 M. M. Jadhav, J. V. Vaghasiya, D. S. Patil, S. S. Soni and N. Sekar, *New J. Chem.*, 2018, **42**, 5267–5275.
- S9 L. Han, H. Wu, Y. Cui, X. Zu, Q. Ye and J. Gao, *J. Photochem. Photobiol. A Chem.*, 2014, **290**, 54–62.
- S10 B. Liu, W. Li, B. Wang, X. Li, Q. Liu, Y. Naruta and W. Zhu, *J. Power Sources*, 2013, **234**, 139–146.

Table S16: Impedance spectroscopy fitting parameters of DSSCs sensitized with MD dye

| Photovoltaic parameters | MD chromophore |         |         |         |         |         |
|-------------------------|----------------|---------|---------|---------|---------|---------|
|                         | MD1            | MD2     | MD3     | MD4     | MD5     | MD6     |
| RCT ( $\Omega$ ) b      | 22.81          | 23.64   | 23.22   | 24.63   | 23.10   | 23.28   |
| CPE-P                   | 0.81           | 0.78    | 0.77    | 0.79    | 0.75    | 0.77    |
| C (F cm <sup>-2</sup> ) | 0.00257        | 0.00241 | 0.00344 | 0.00318 | 0.00324 | 0.00352 |

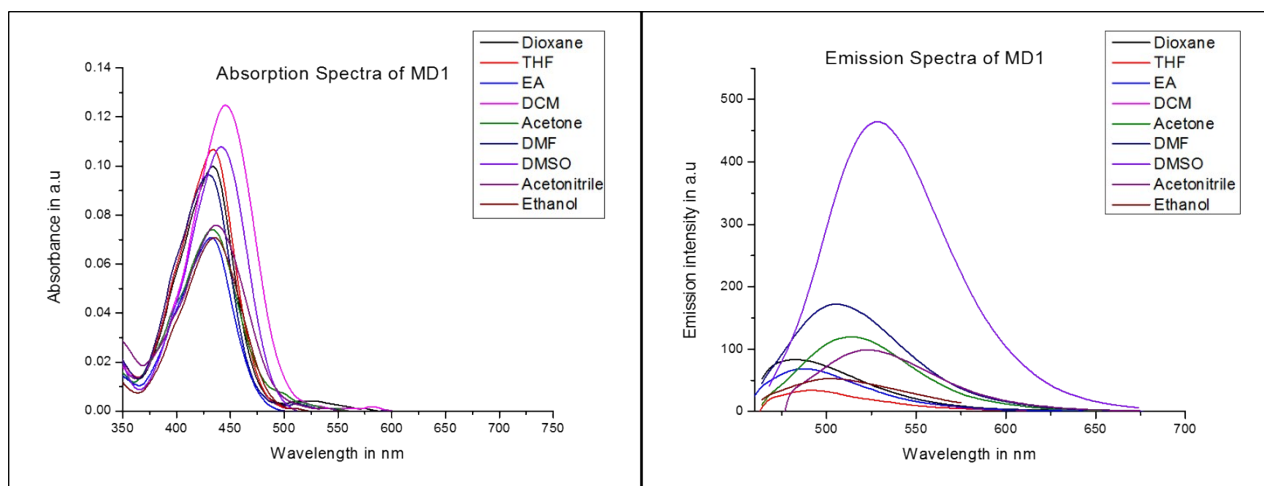

**Fig. S1.** Absorption and Emission spectra of MD1.

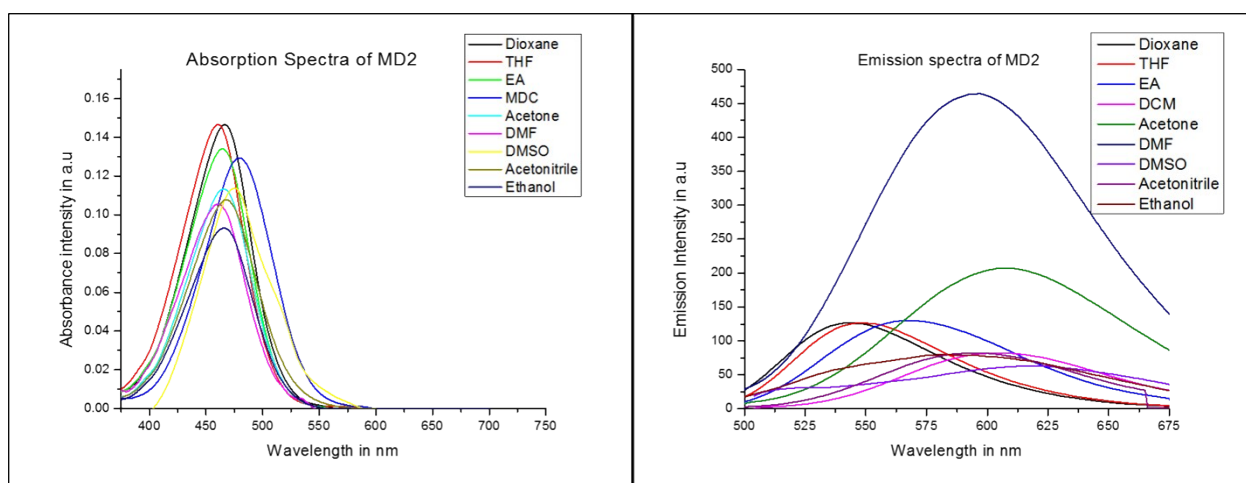

**Fig. S2.** Absorption and Emission spectra of MD2.

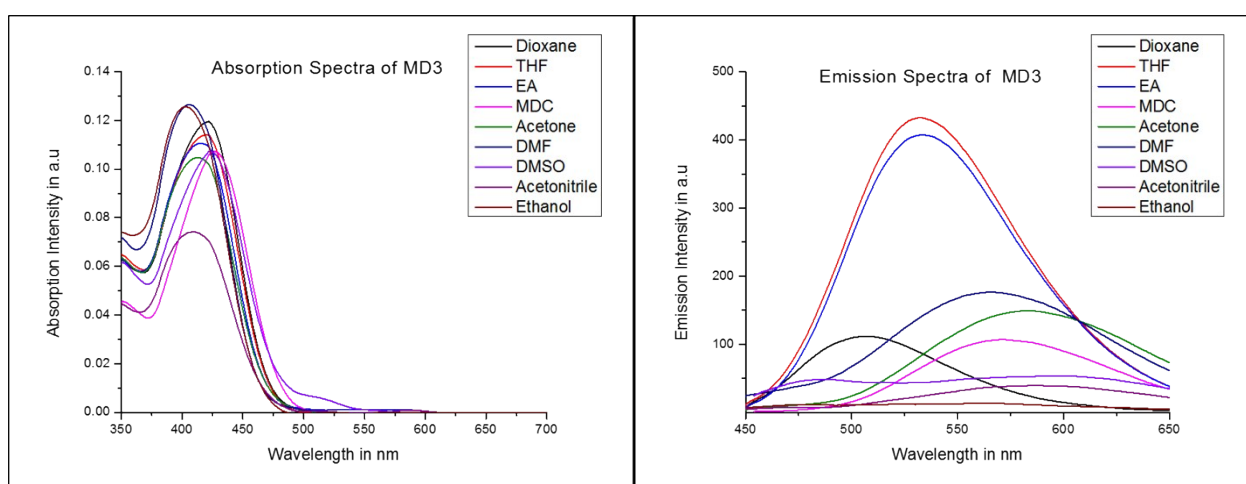

**Fig. S3.** Absorption and Emission spectra of MD3.



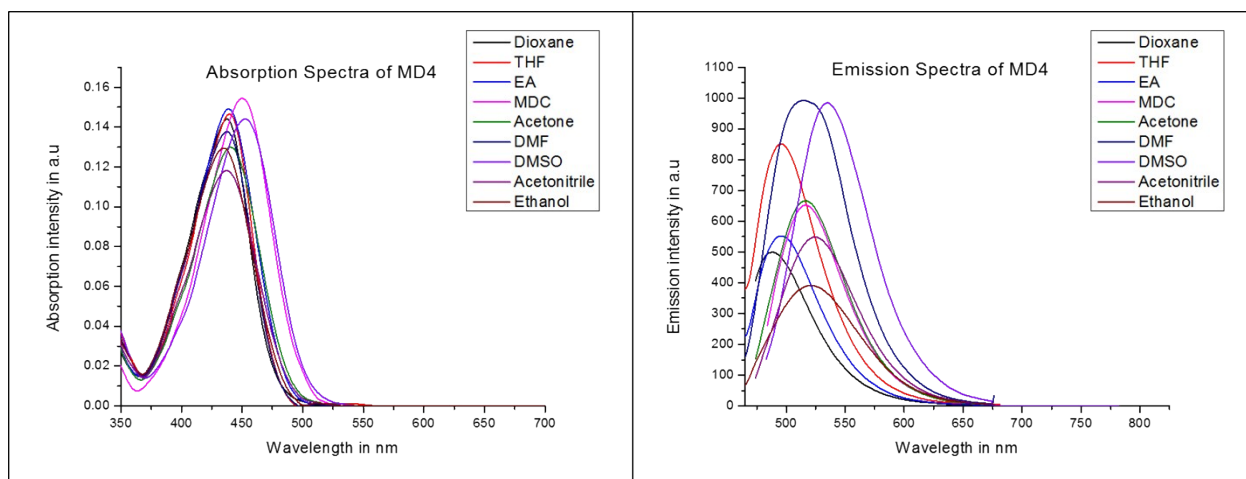

**Fig. S4.** Absorption and Emission spectra of MD4.

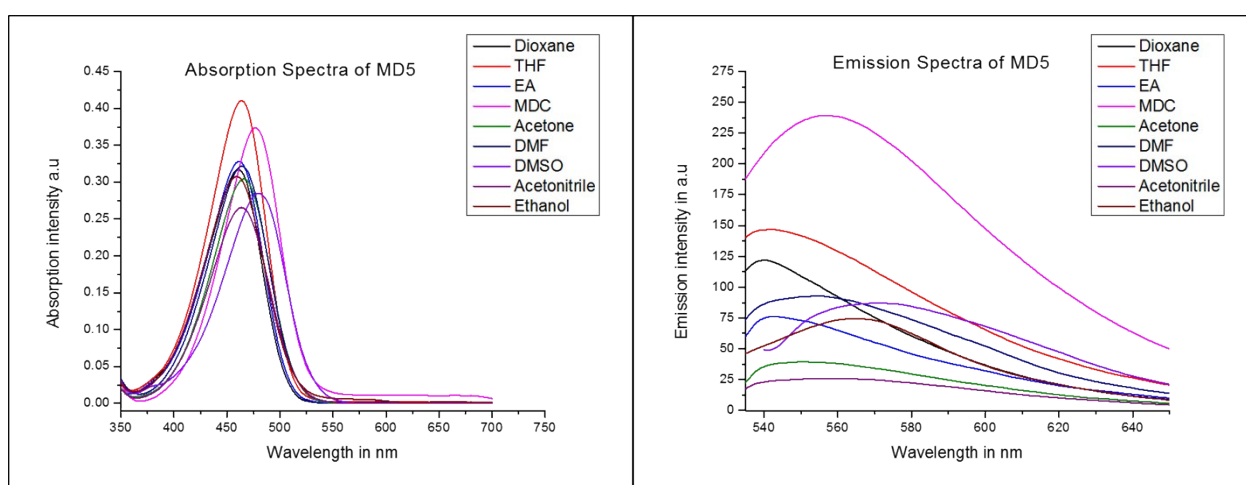

**Fig. S5.** Absorption and Emission spectra of MD5.

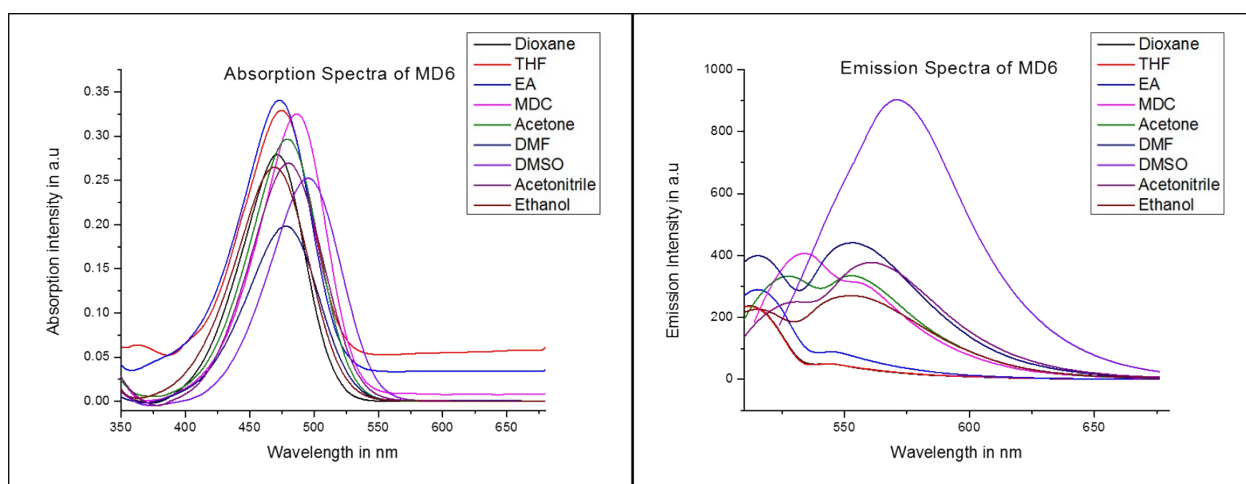

**Fig. S6.** Absorption and Emission spectra of MD6.

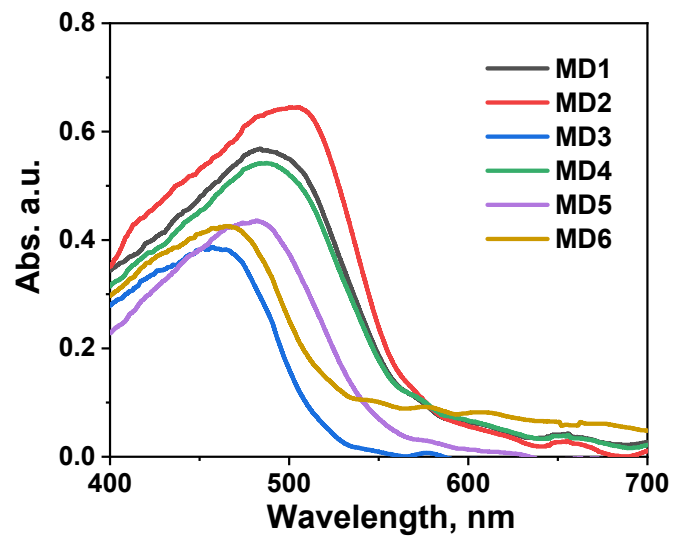

**Fig. S7:** Absorption spectra of MD1-MD6 on titania film

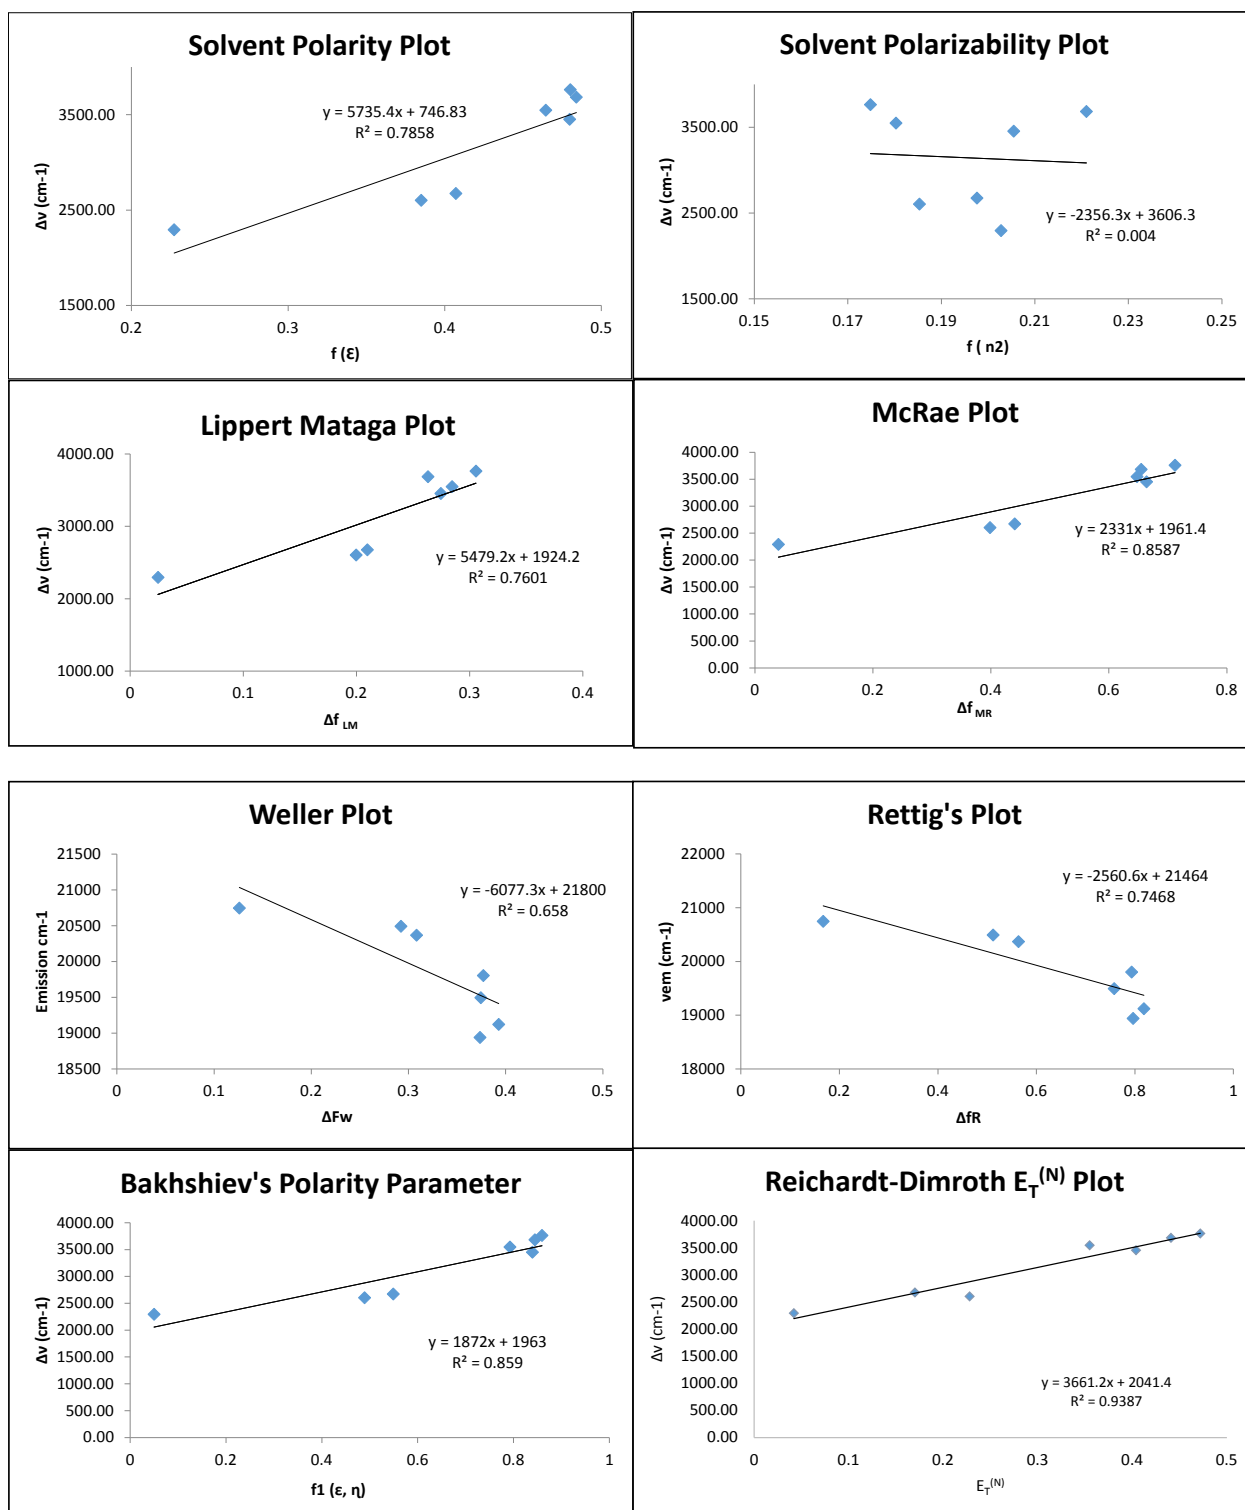

**Fig. S8:** Solvent polarity plots for MD1

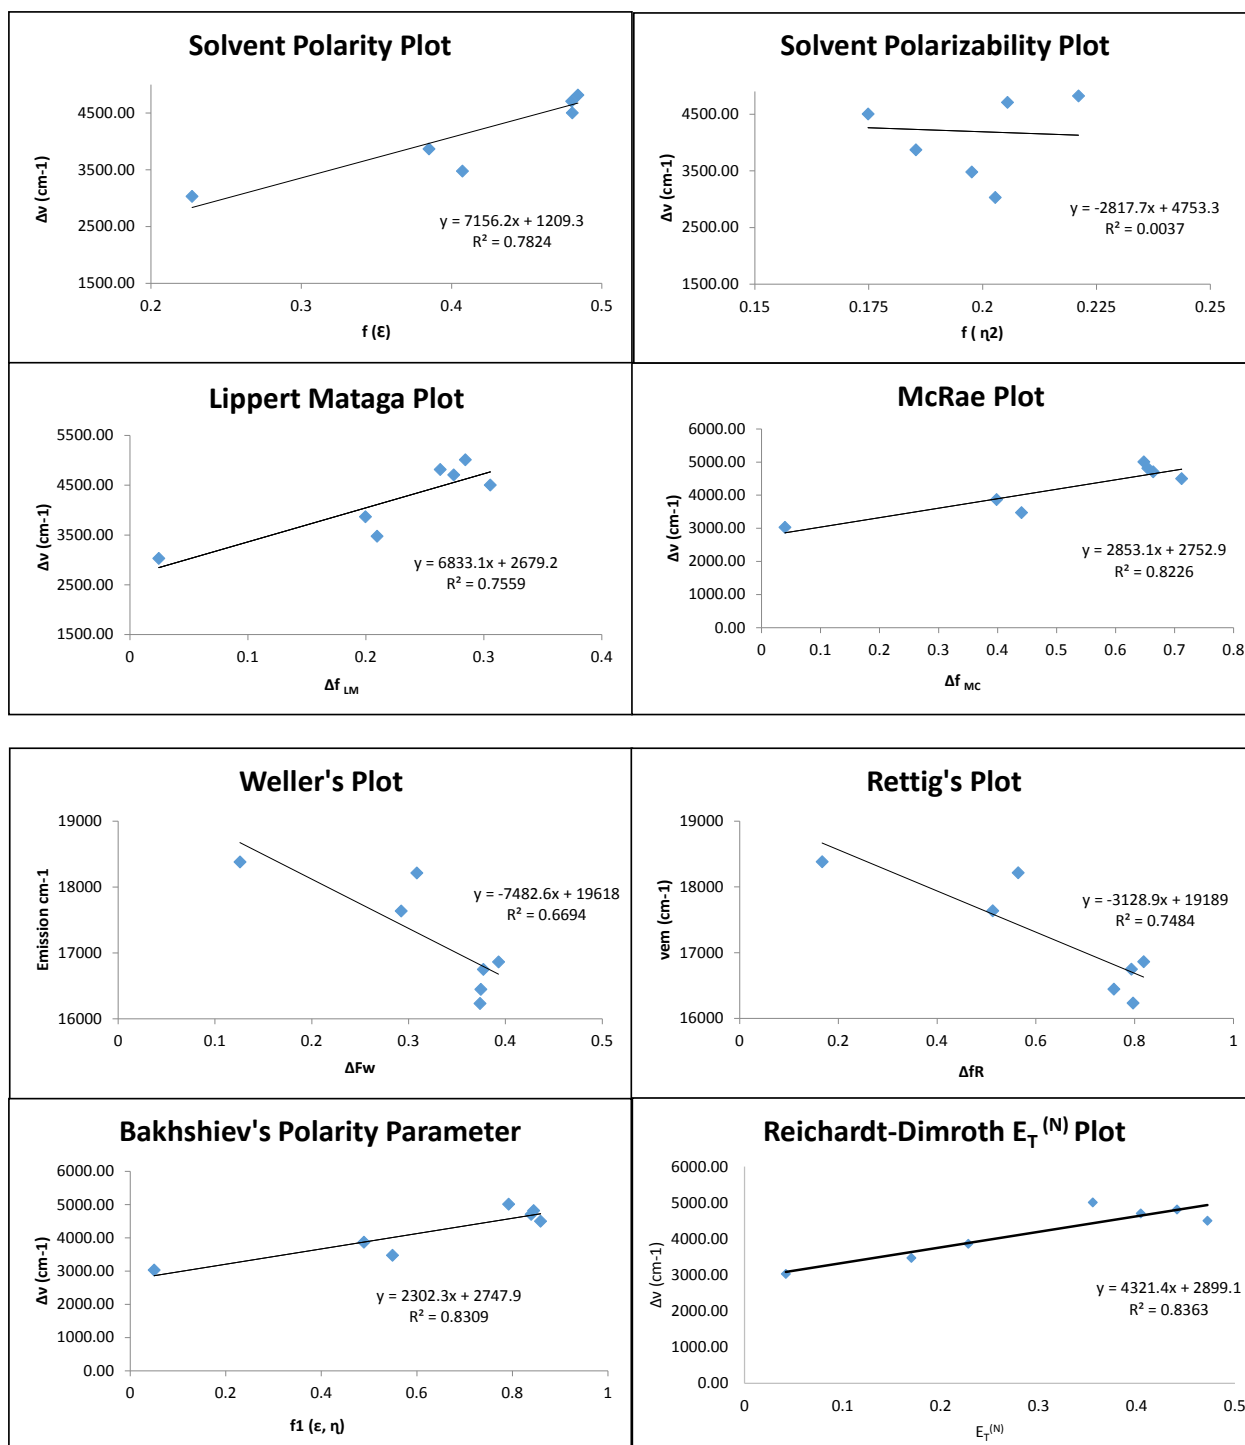

Fig. S9: Solvent polarity plots for MD2

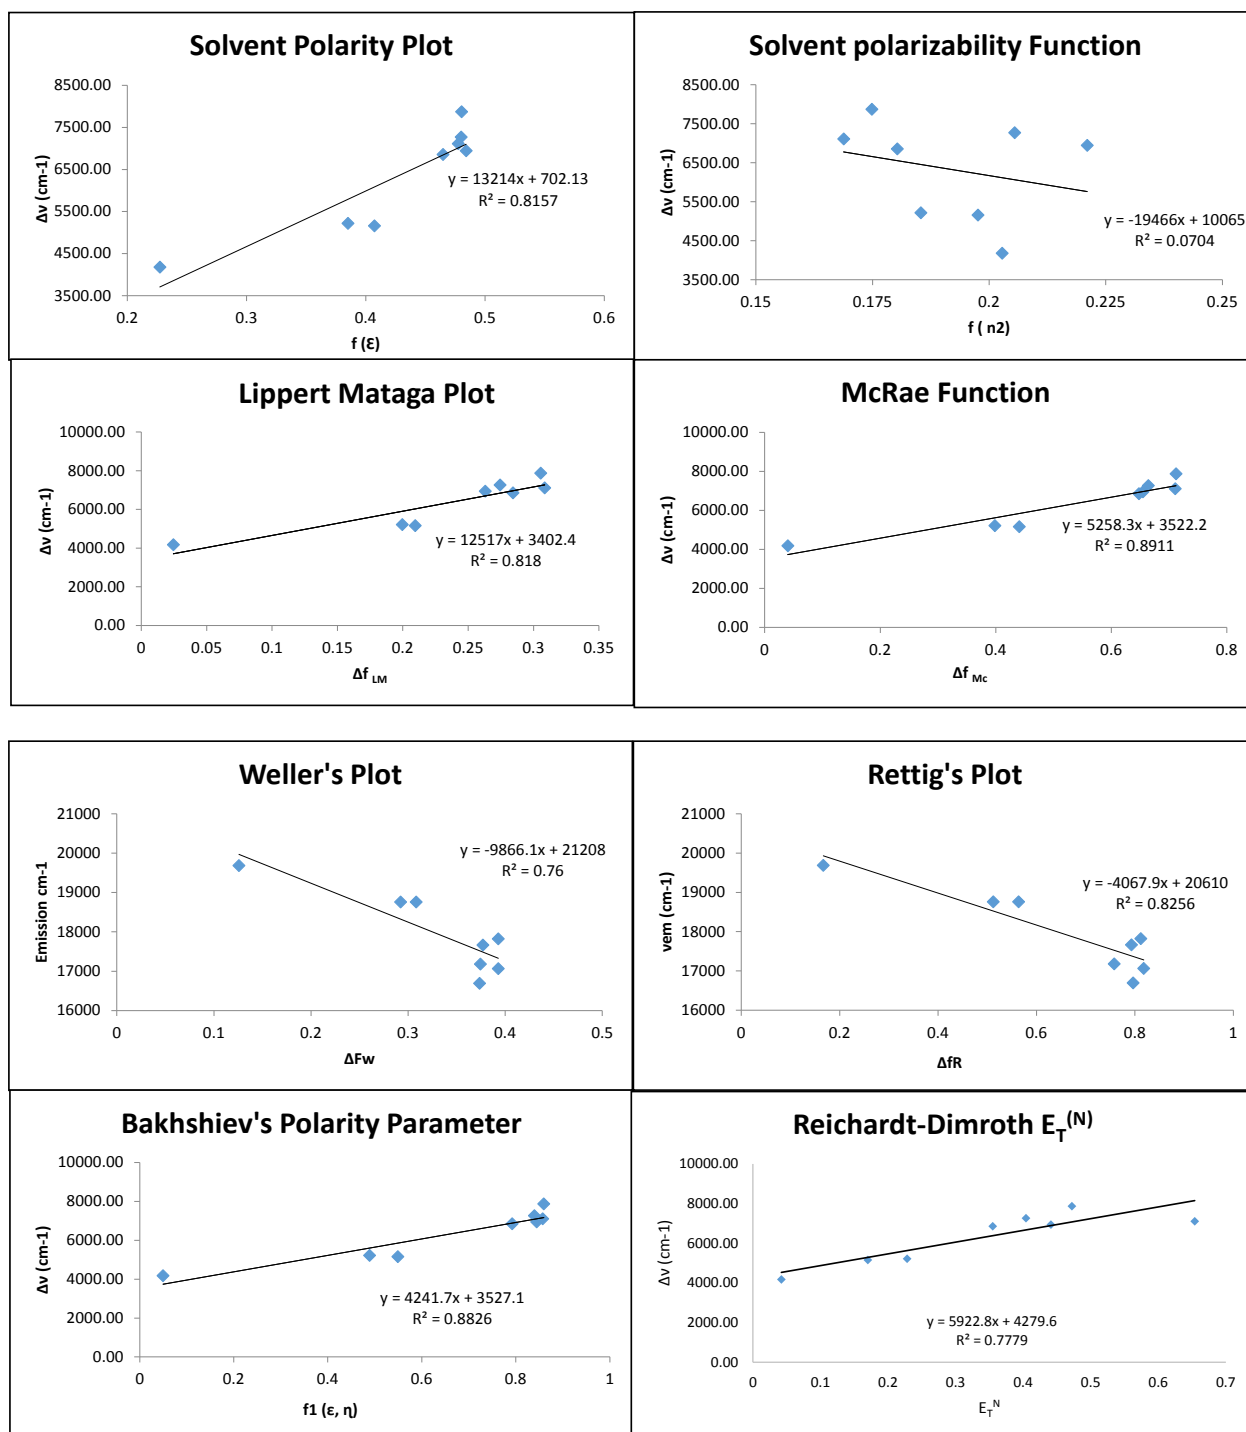

Fig. S10: Solvent polarity plots for MD3

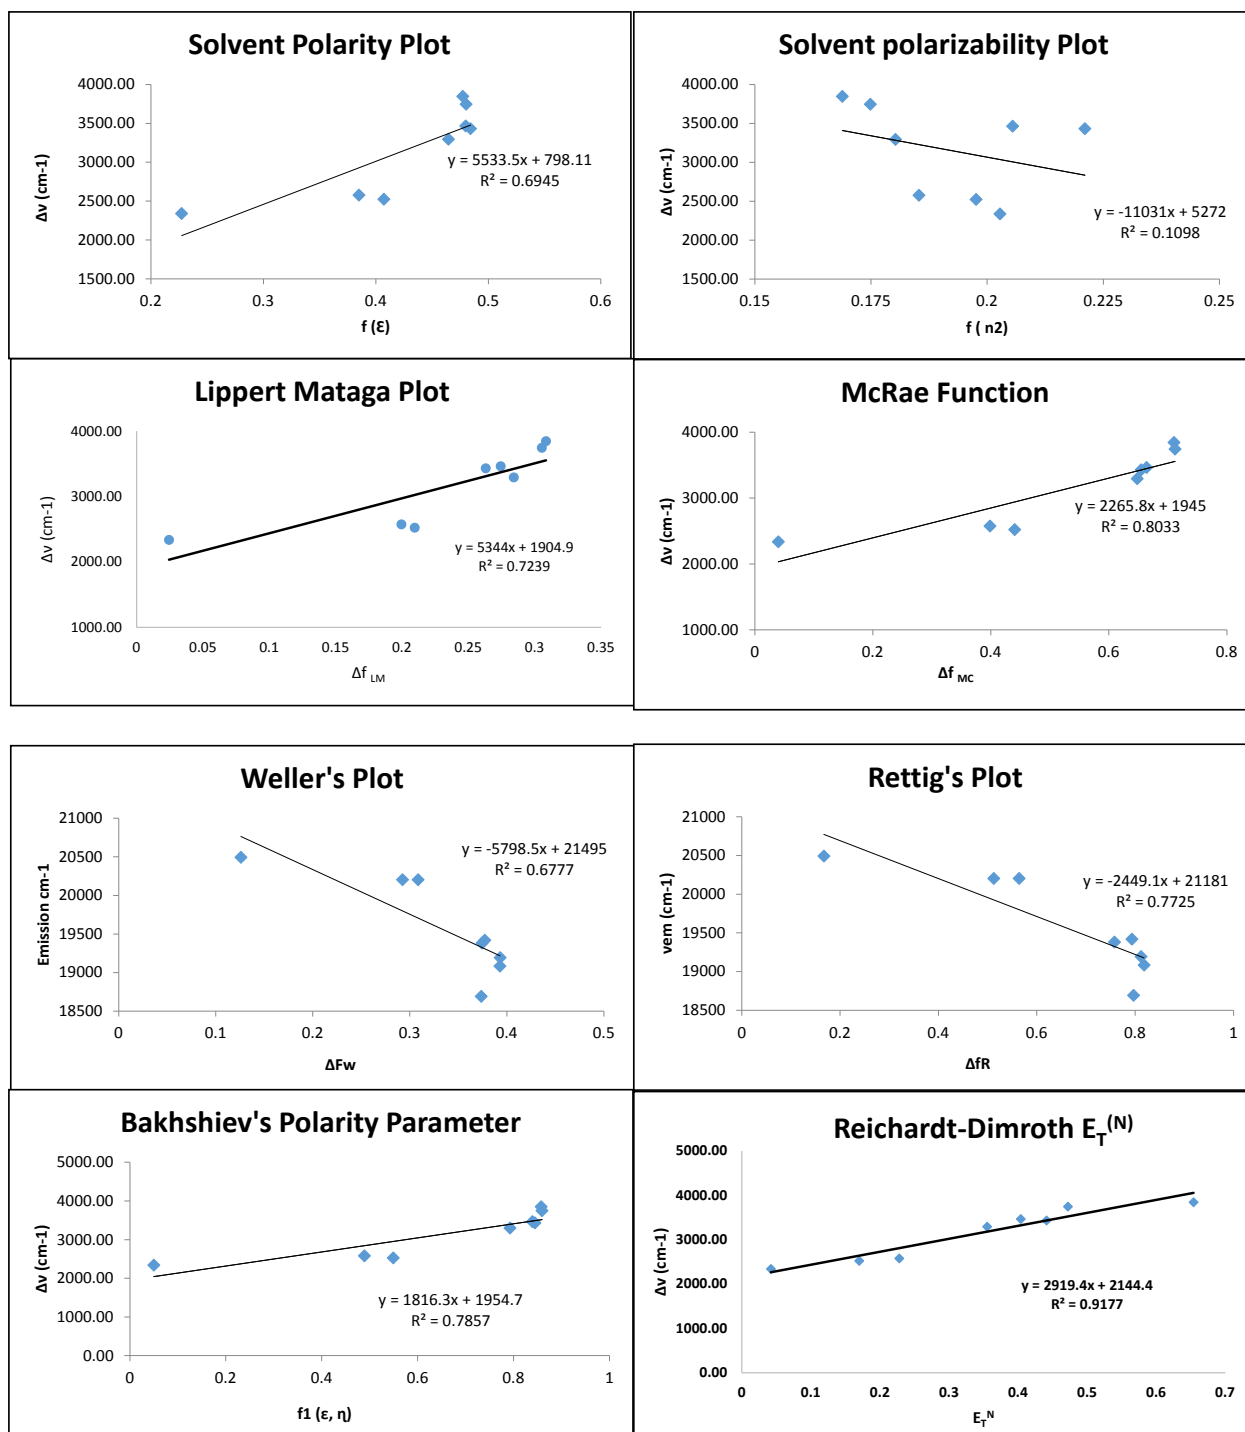

Fig. S11: Solvent polarity plots for MD4

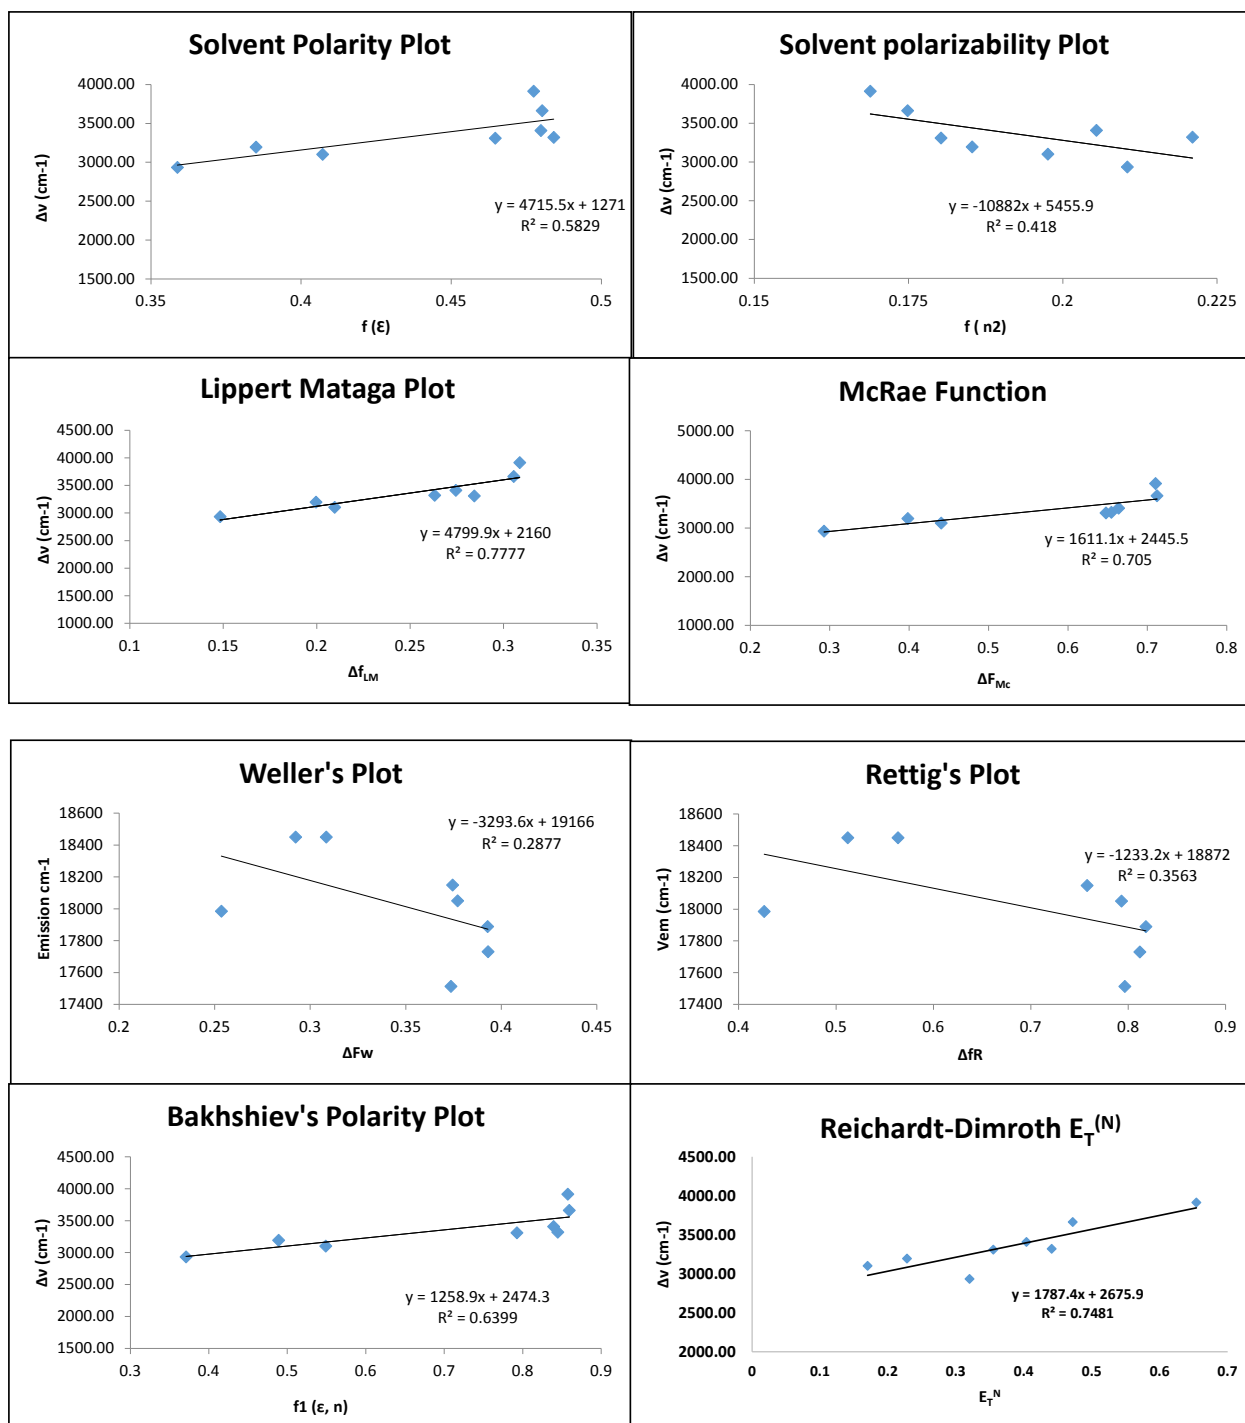

**Fig. S12:** Solvent polarity plots for MD5

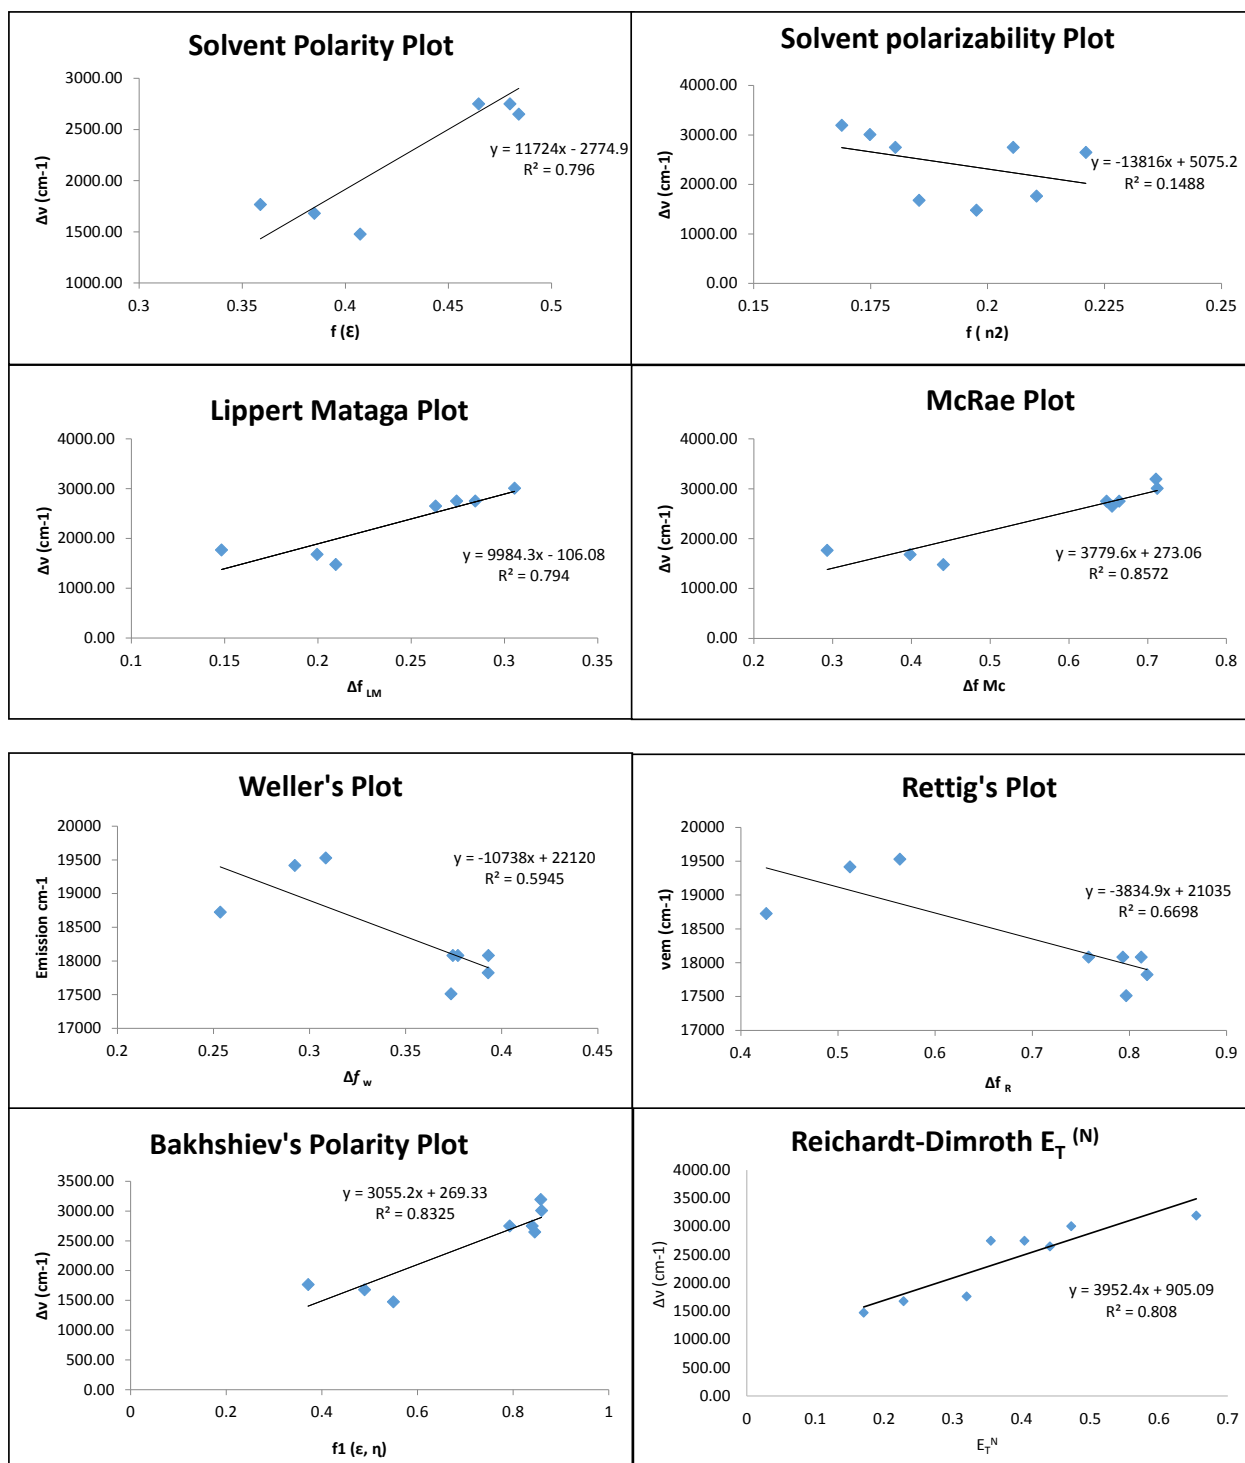

**Fig. S13:** Solvent polarity plots for MD6



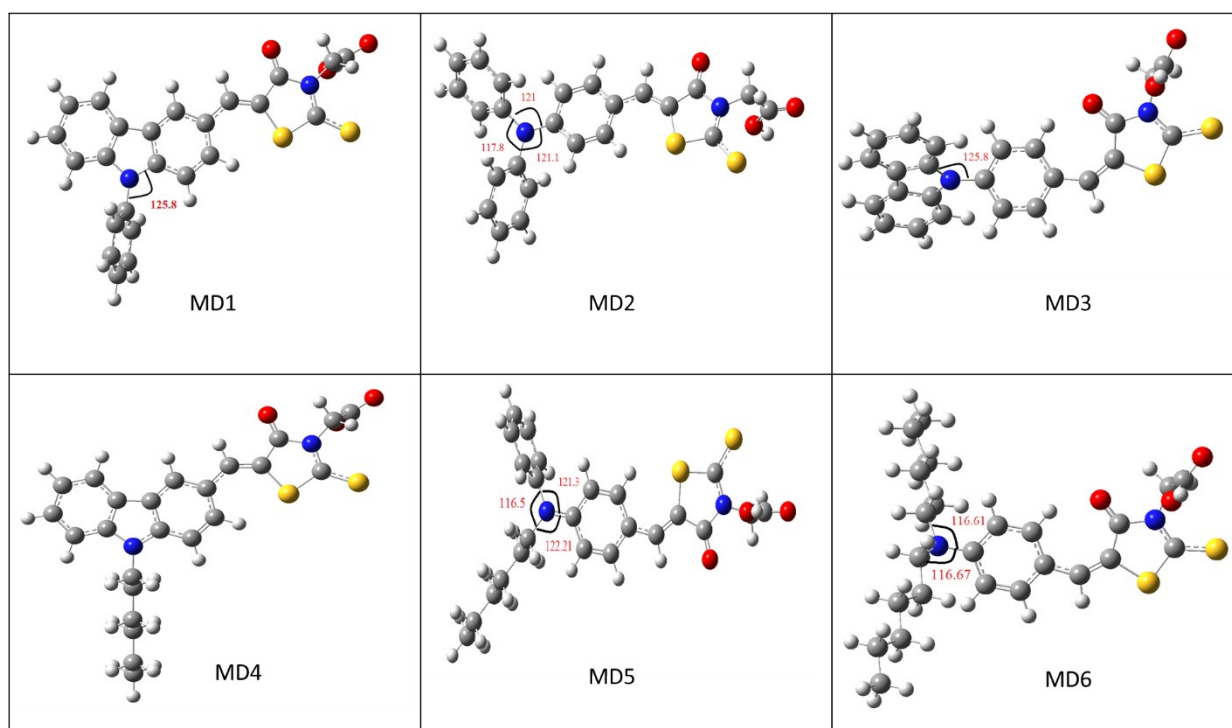

**Figure S14.** Optimised structures of **MD1** to **MD6** in acetonitrile

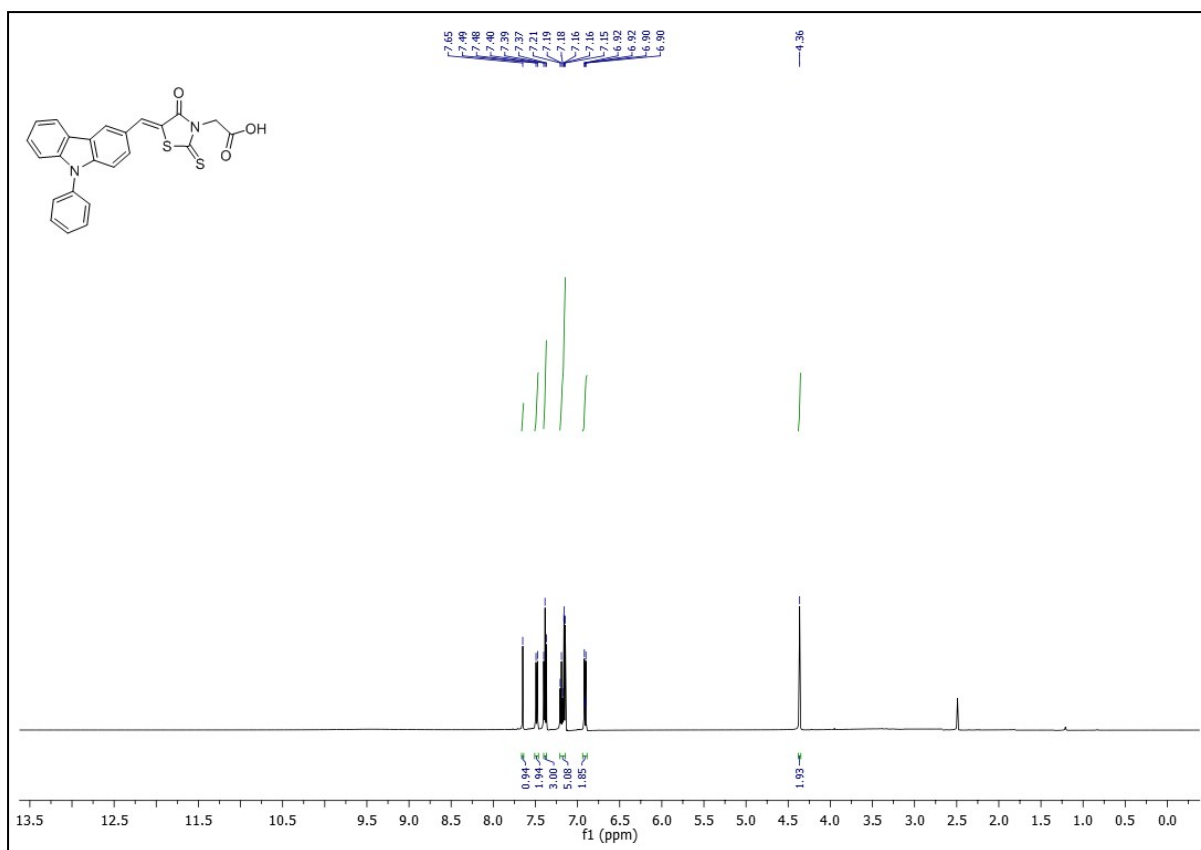

**Fig. S15.** <sup>1</sup>H NMR spectrum of chromophore MD1

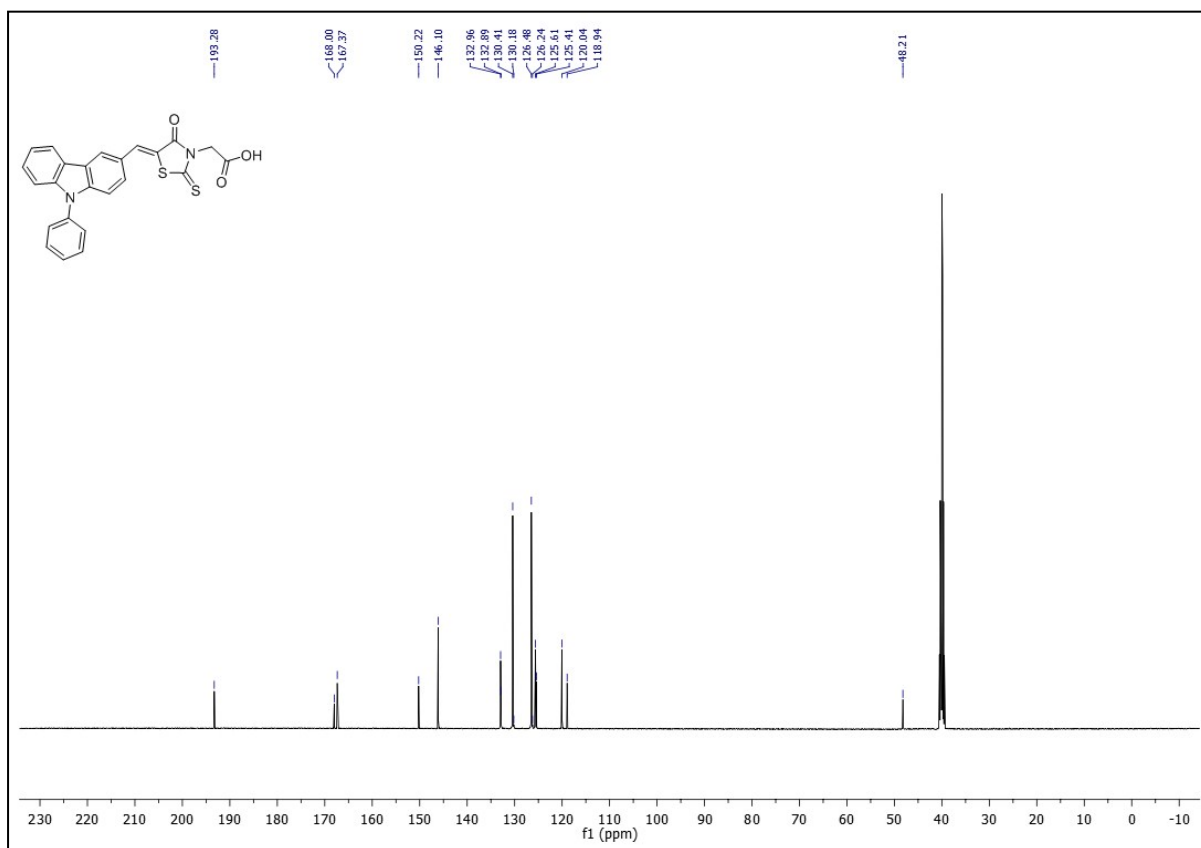

**Fig. S16.** <sup>13</sup>C NMR spectrum of chromophore MD1

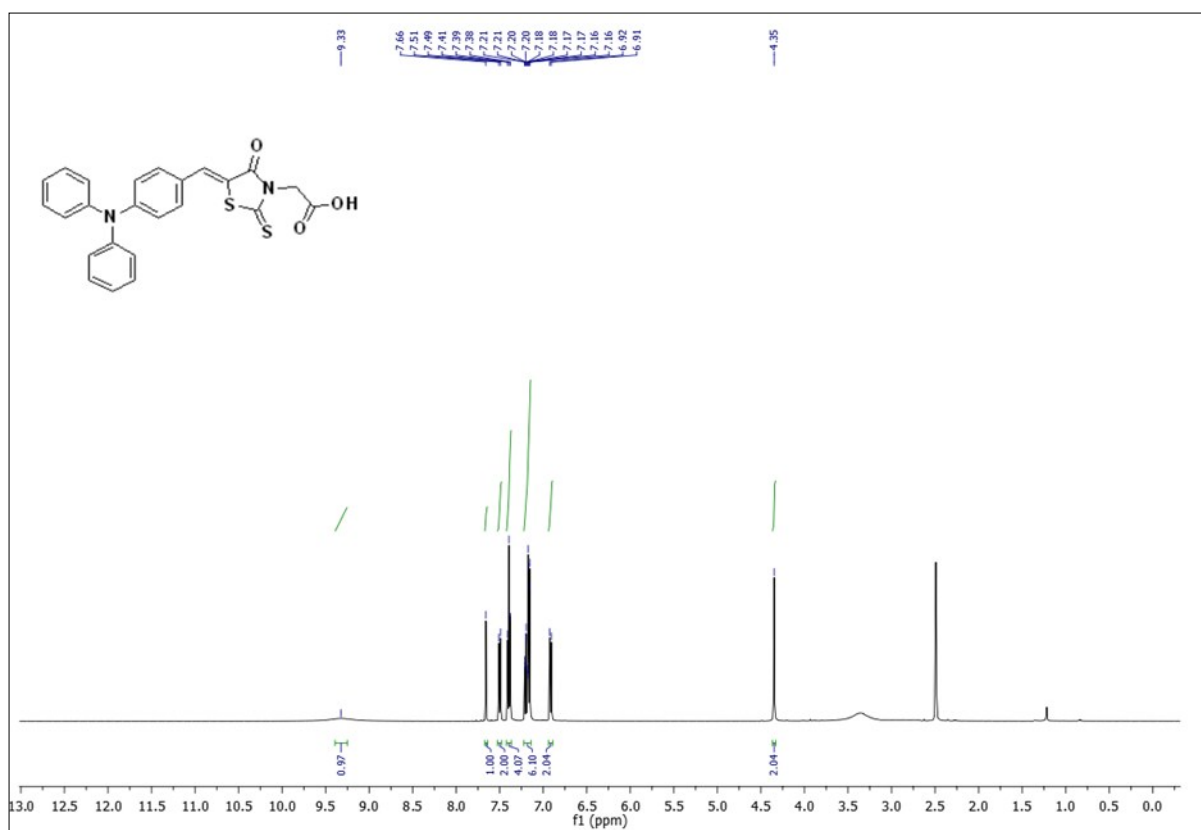

Fig. S17 <sup>1</sup>H NMR spectrum of chromophore MD2

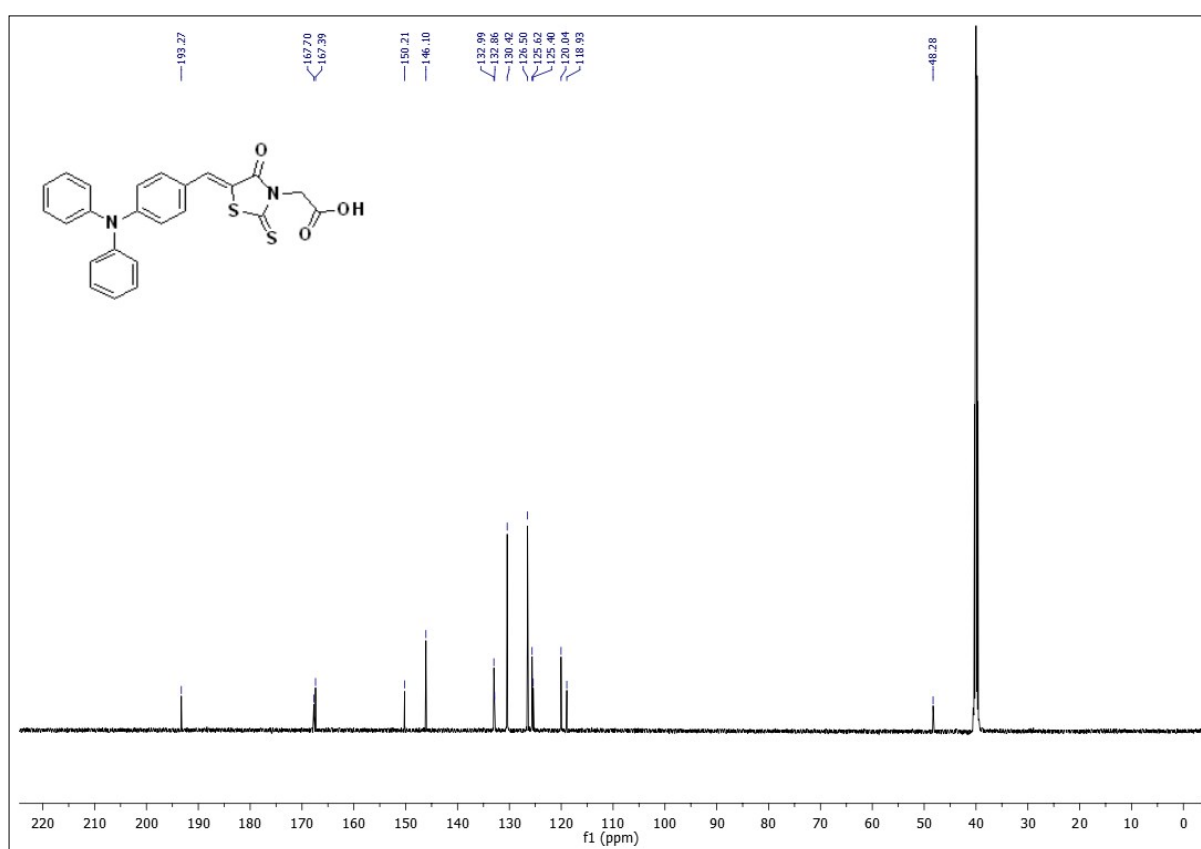

Fig. S18. <sup>13</sup>C NMR spectrum of chromophore MD2

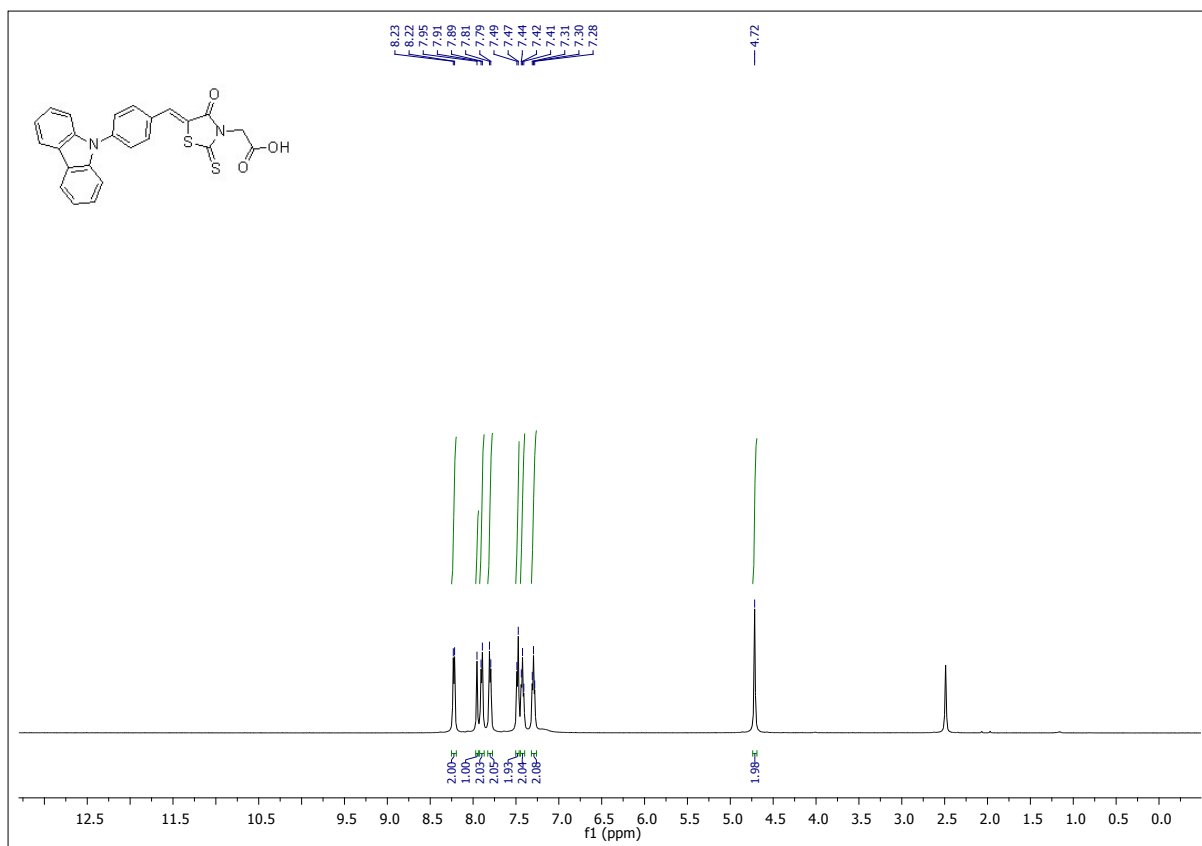

**Fig. S19.** <sup>1</sup>H NMR spectrum of chromophore MD3

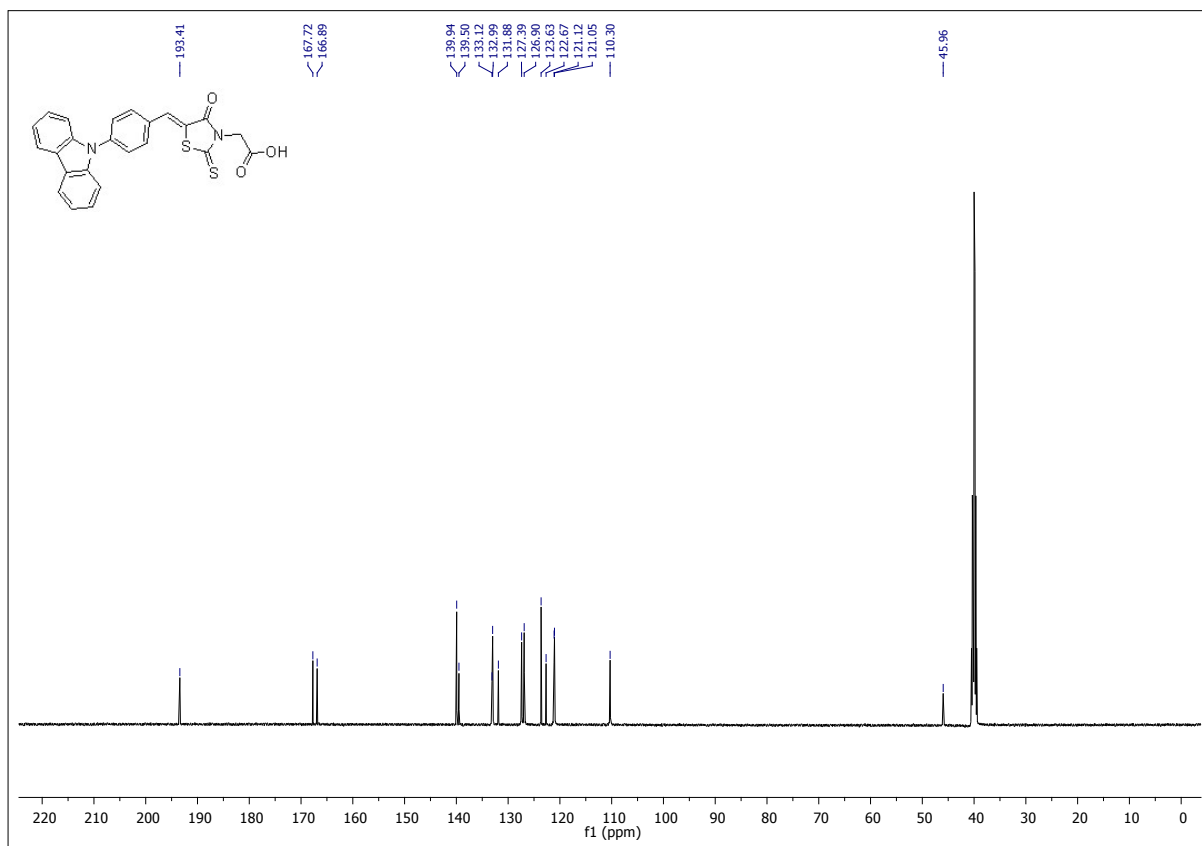

**Fig. S20.** <sup>13</sup>C NMR spectrum of chromophore MD3

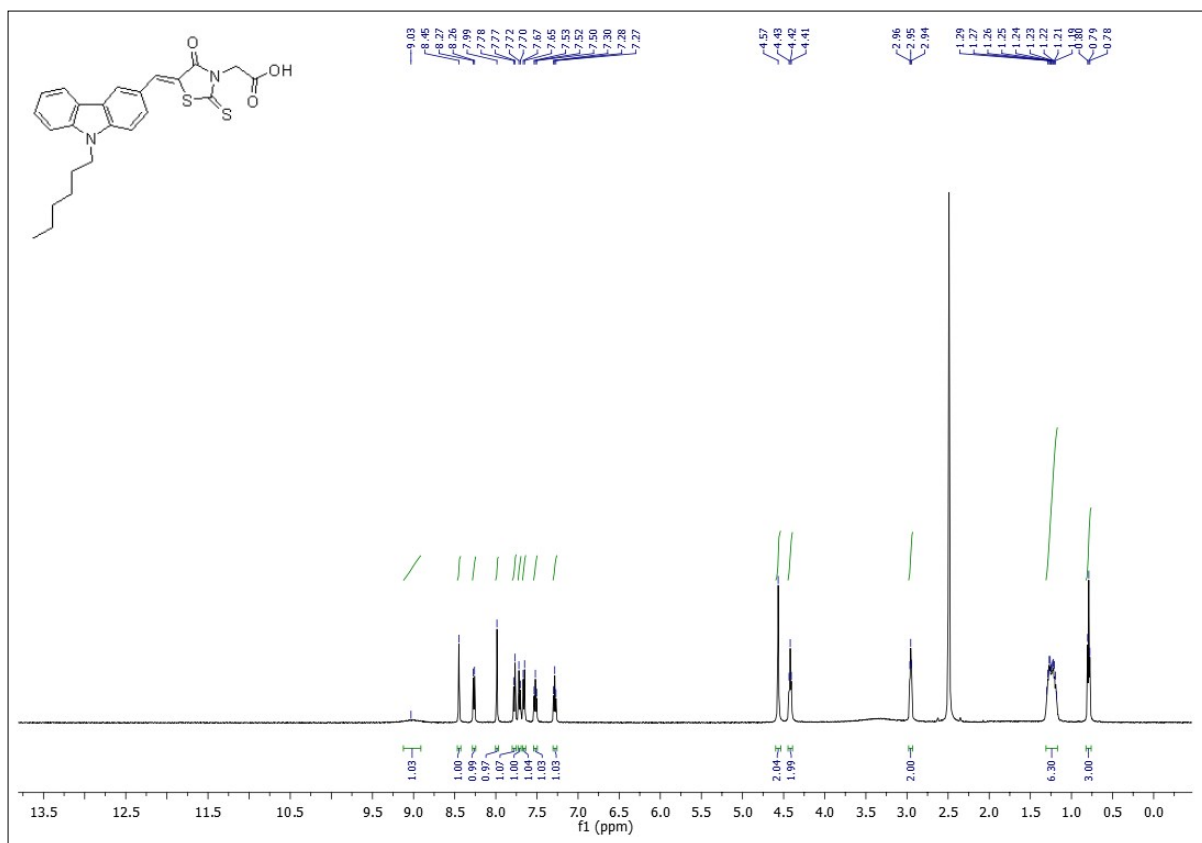

Fig. S21.  $^1\text{H}$  NMR spectrum of chromophore MD4

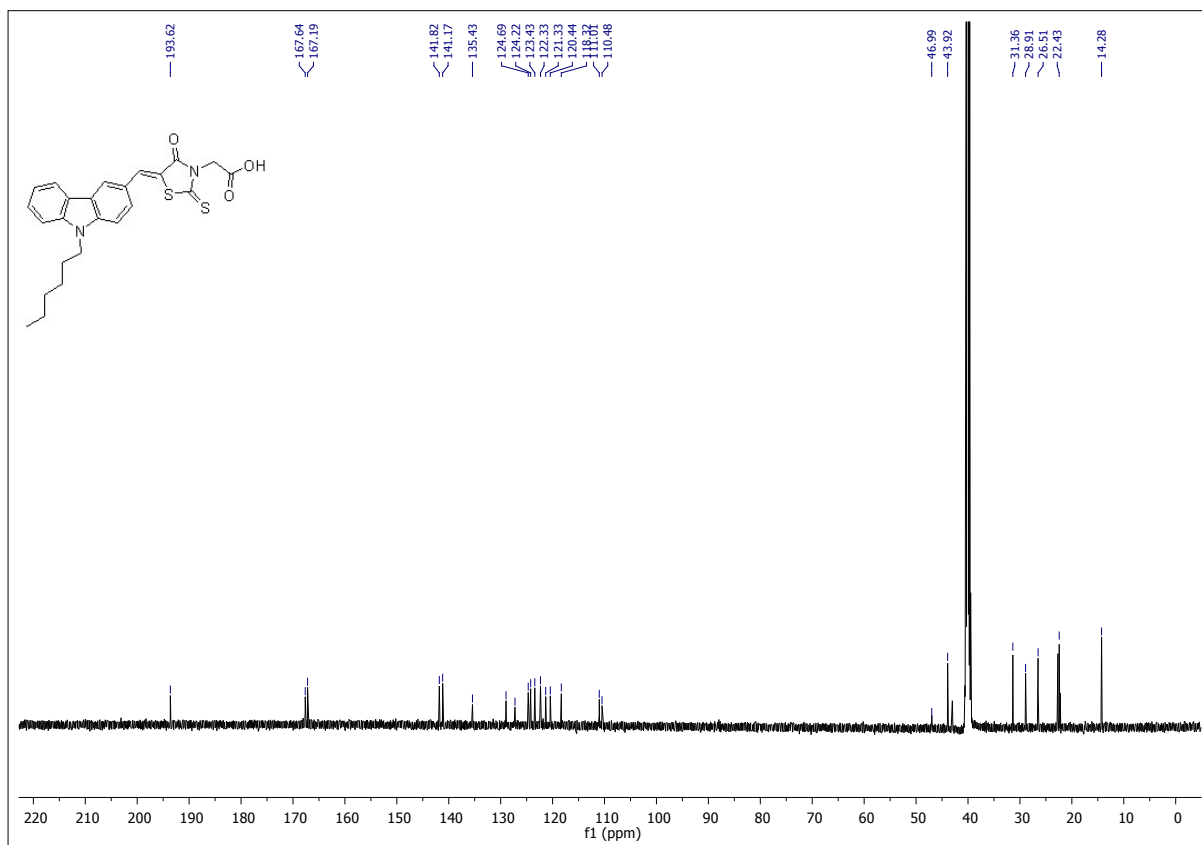

Fig. S22.  $^{13}\text{C}$  NMR spectrum of chromophore MD4

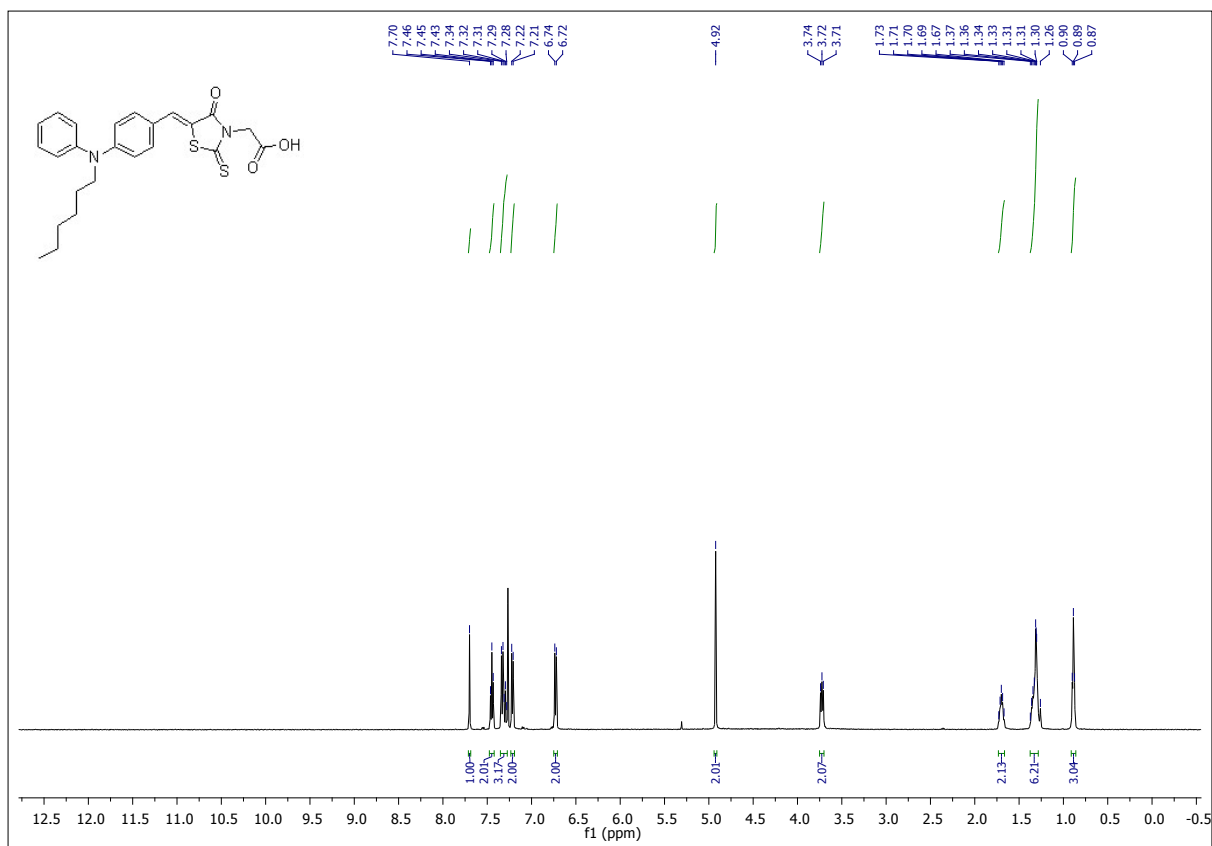

Fig. S23.  $^1\text{H}$  NMR spectrum of chromophore MD5

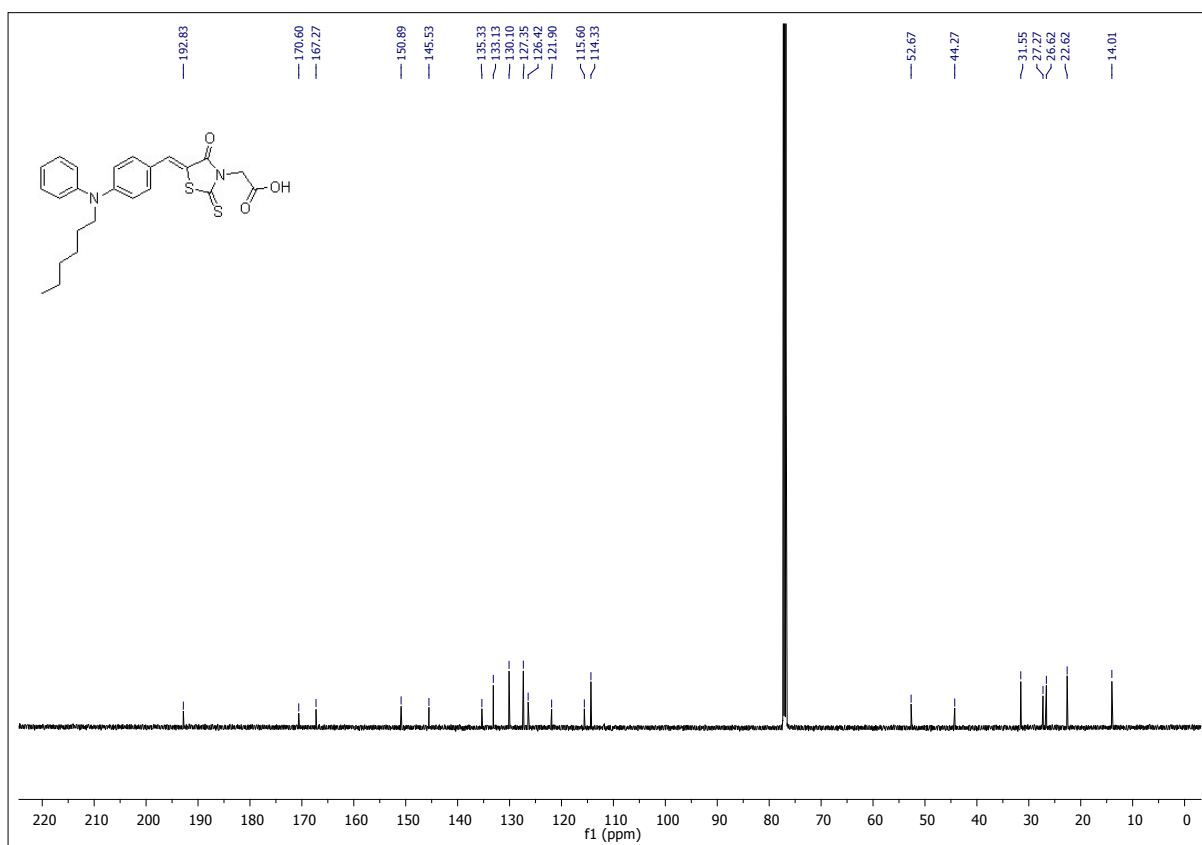

Fig. S24.  $^{13}\text{C}$  NMR spectrum of chromophore MD5

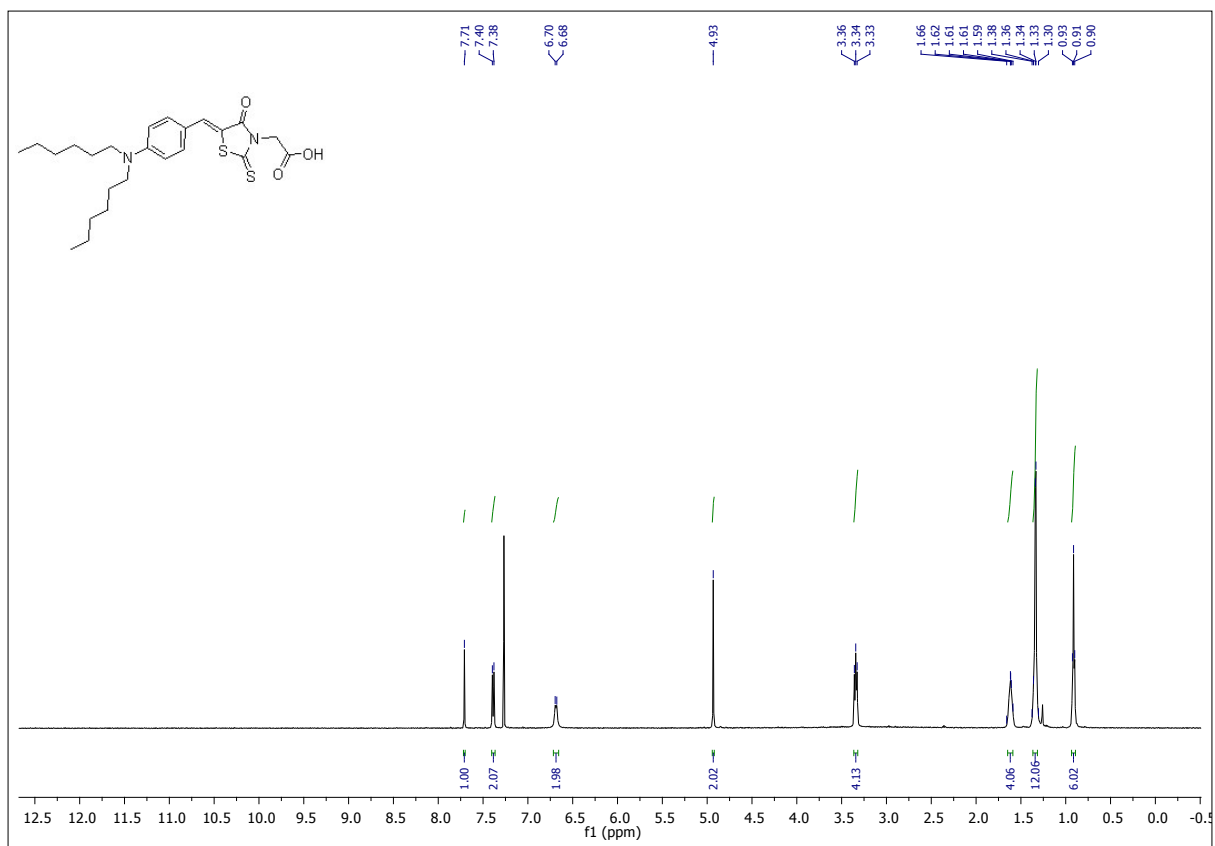

Fig. S25.  $^1\text{H}$  NMR spectrum of chromophore MD6

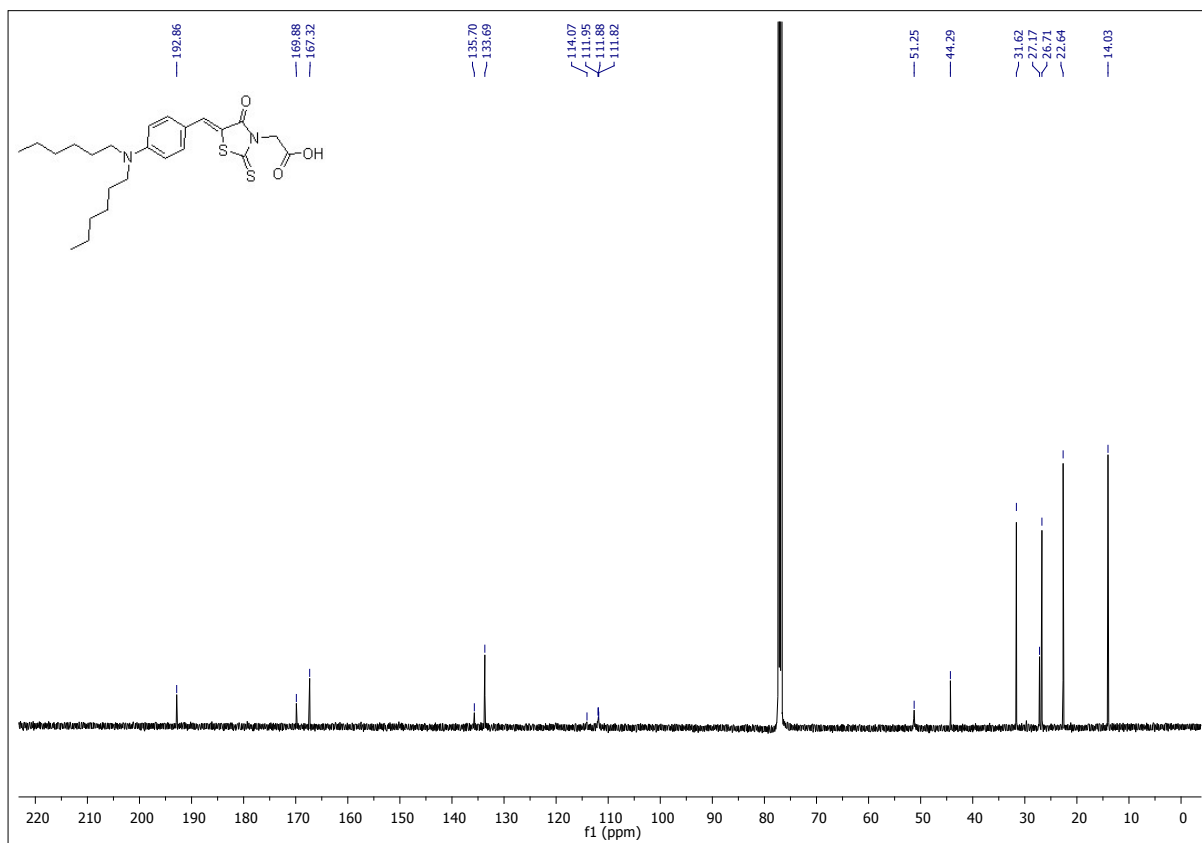

Fig. S26.  $^{13}\text{C}$  NMR spectrum of chromophore MD6

# Spectrum Plot - 2/27/2019 11:00 AM

1 A Scan 6 from f:\ict-sulochna\md-1-444-msms.xms

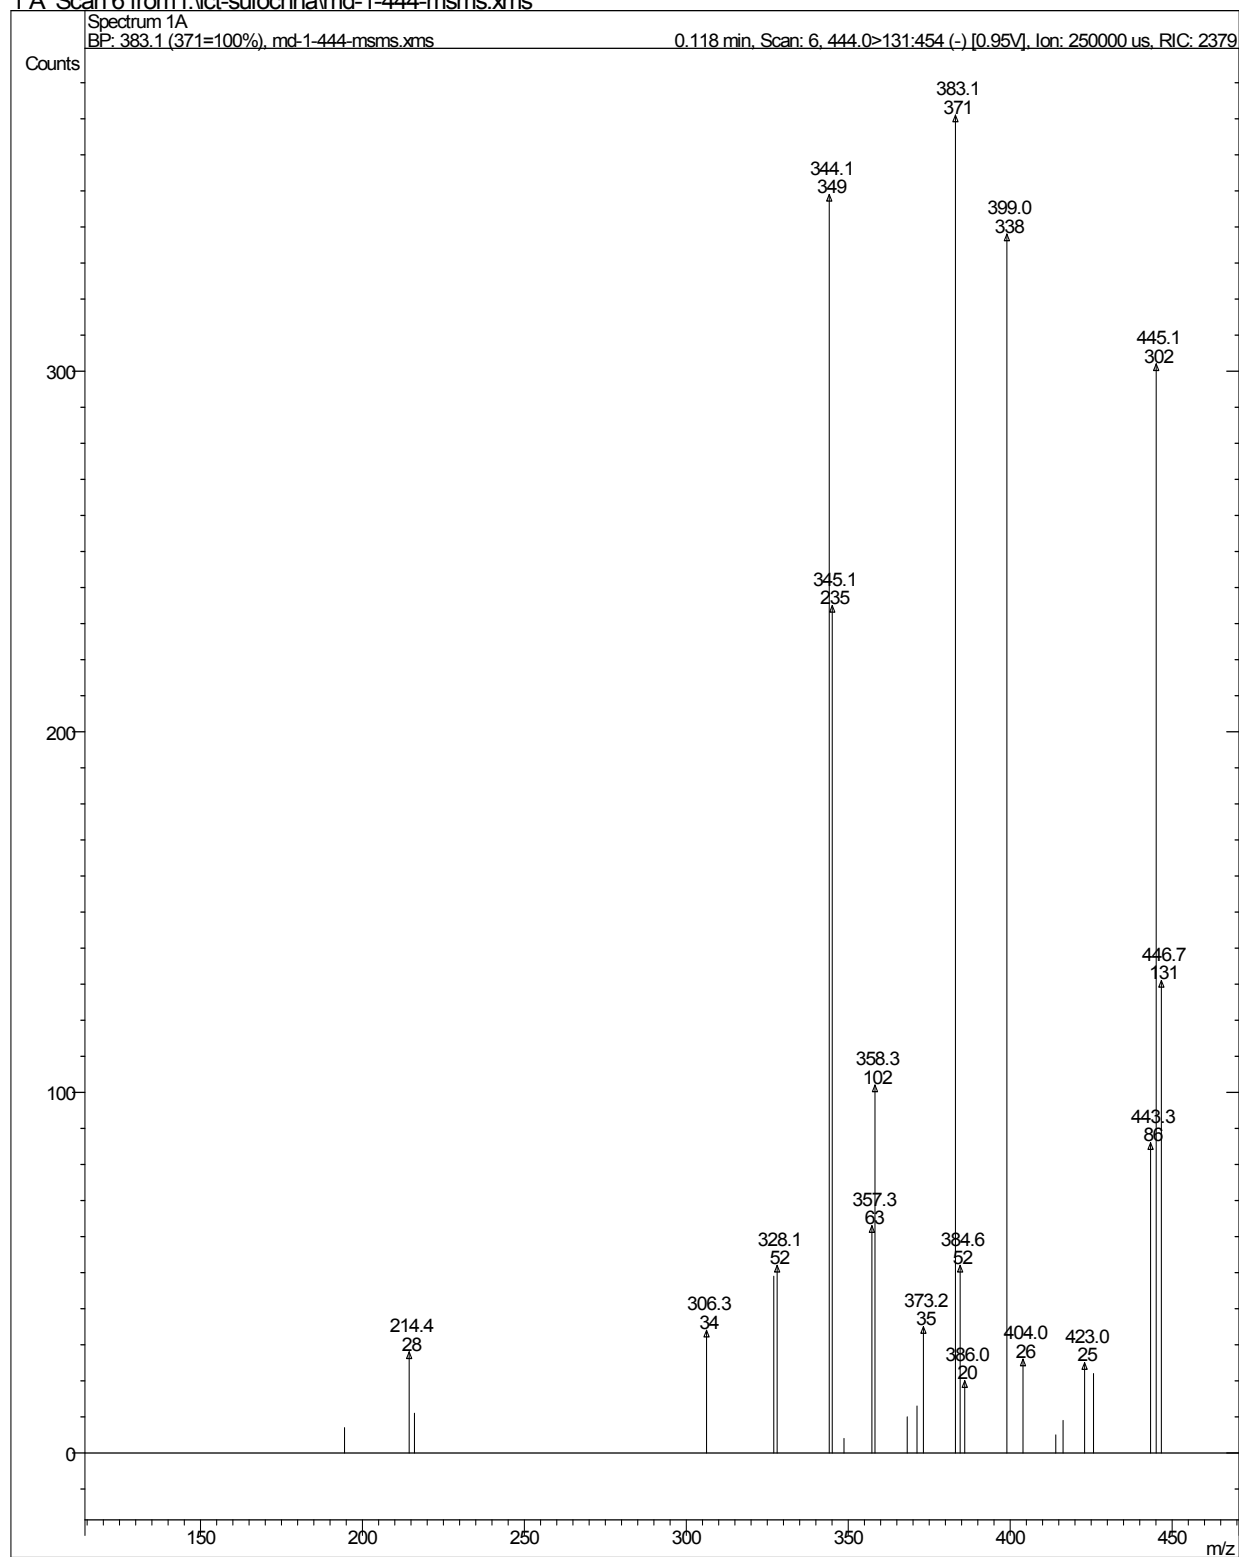

Fig. S27. Mass Spectra of MD1



# Spectrum Plot - 2/27/2019 11:01 AM

1 A Scan 3 from f:\ict-sulochna\md-2\_-ve-446-msms.xms

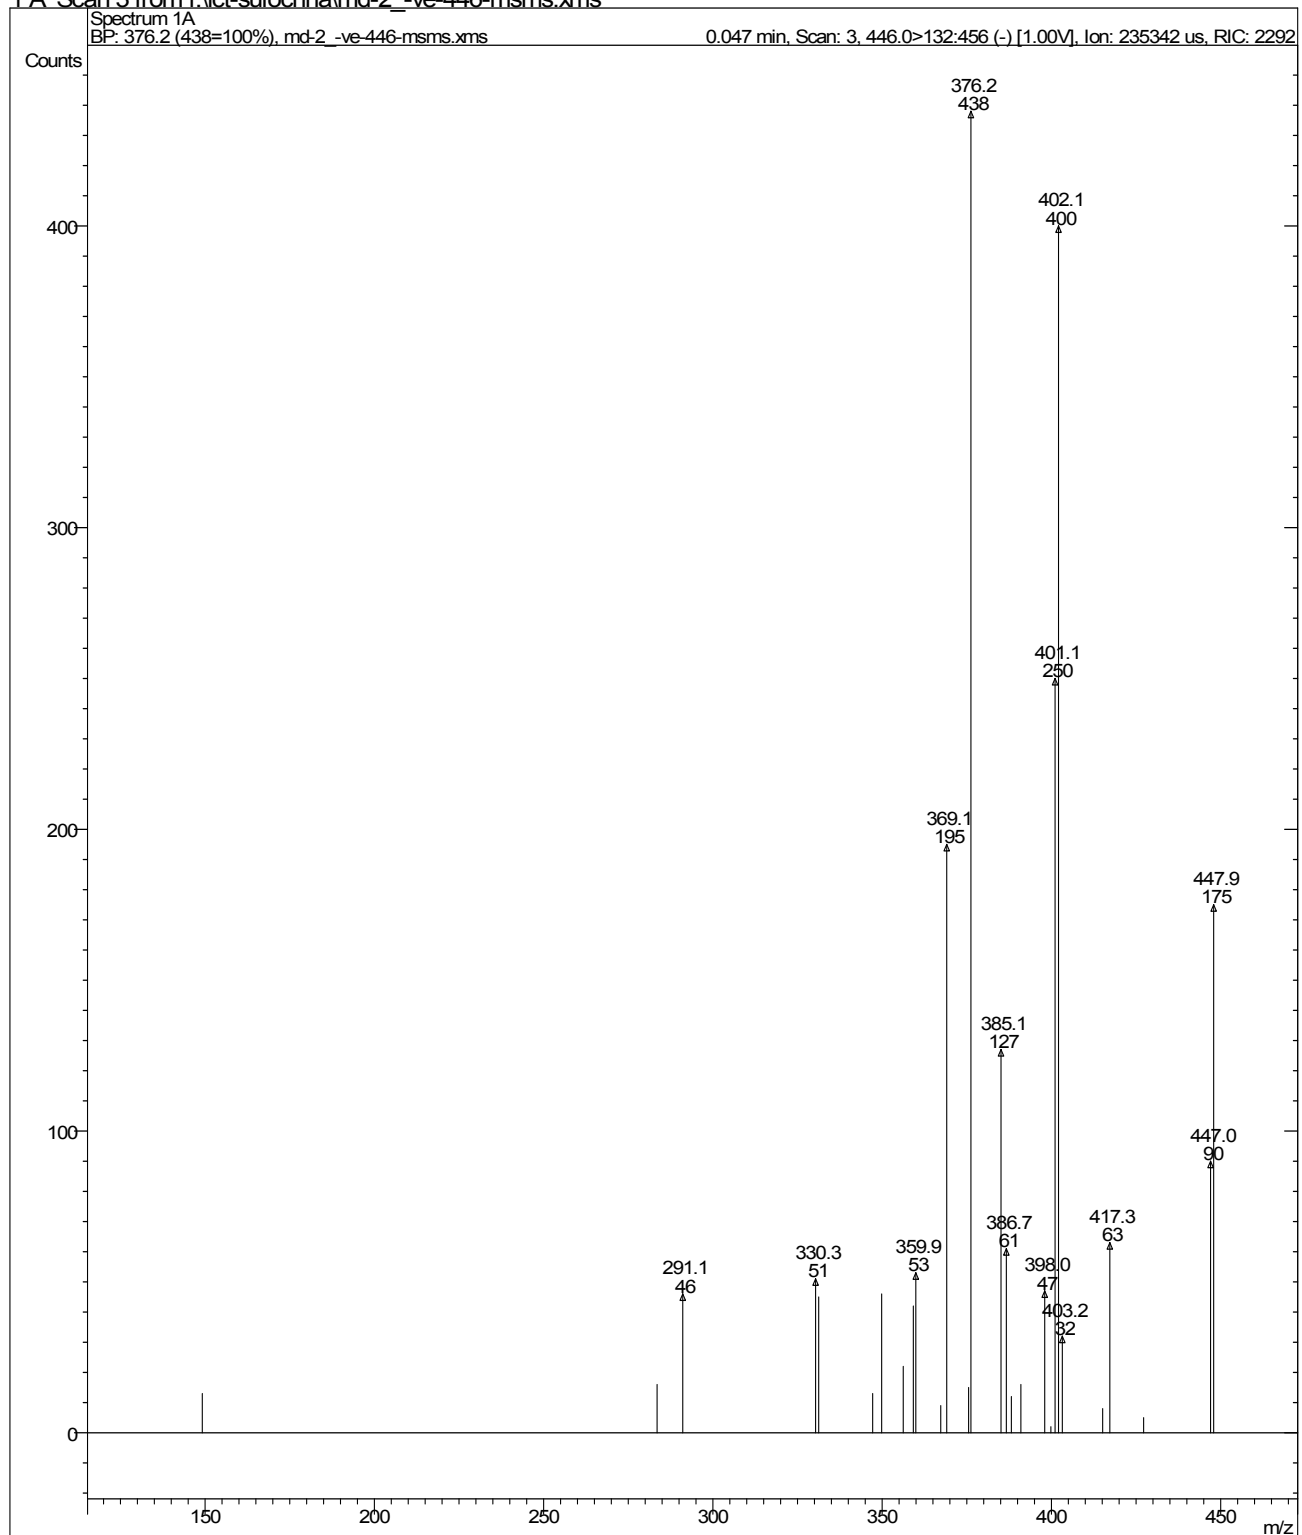

Fig. S28. Mass Spectra of MD2

Spectrum Plot - 2/27/2019 11:18 AM

1 A Scan 11 from f:\ict-sulochna\md-3-445-msms.xms

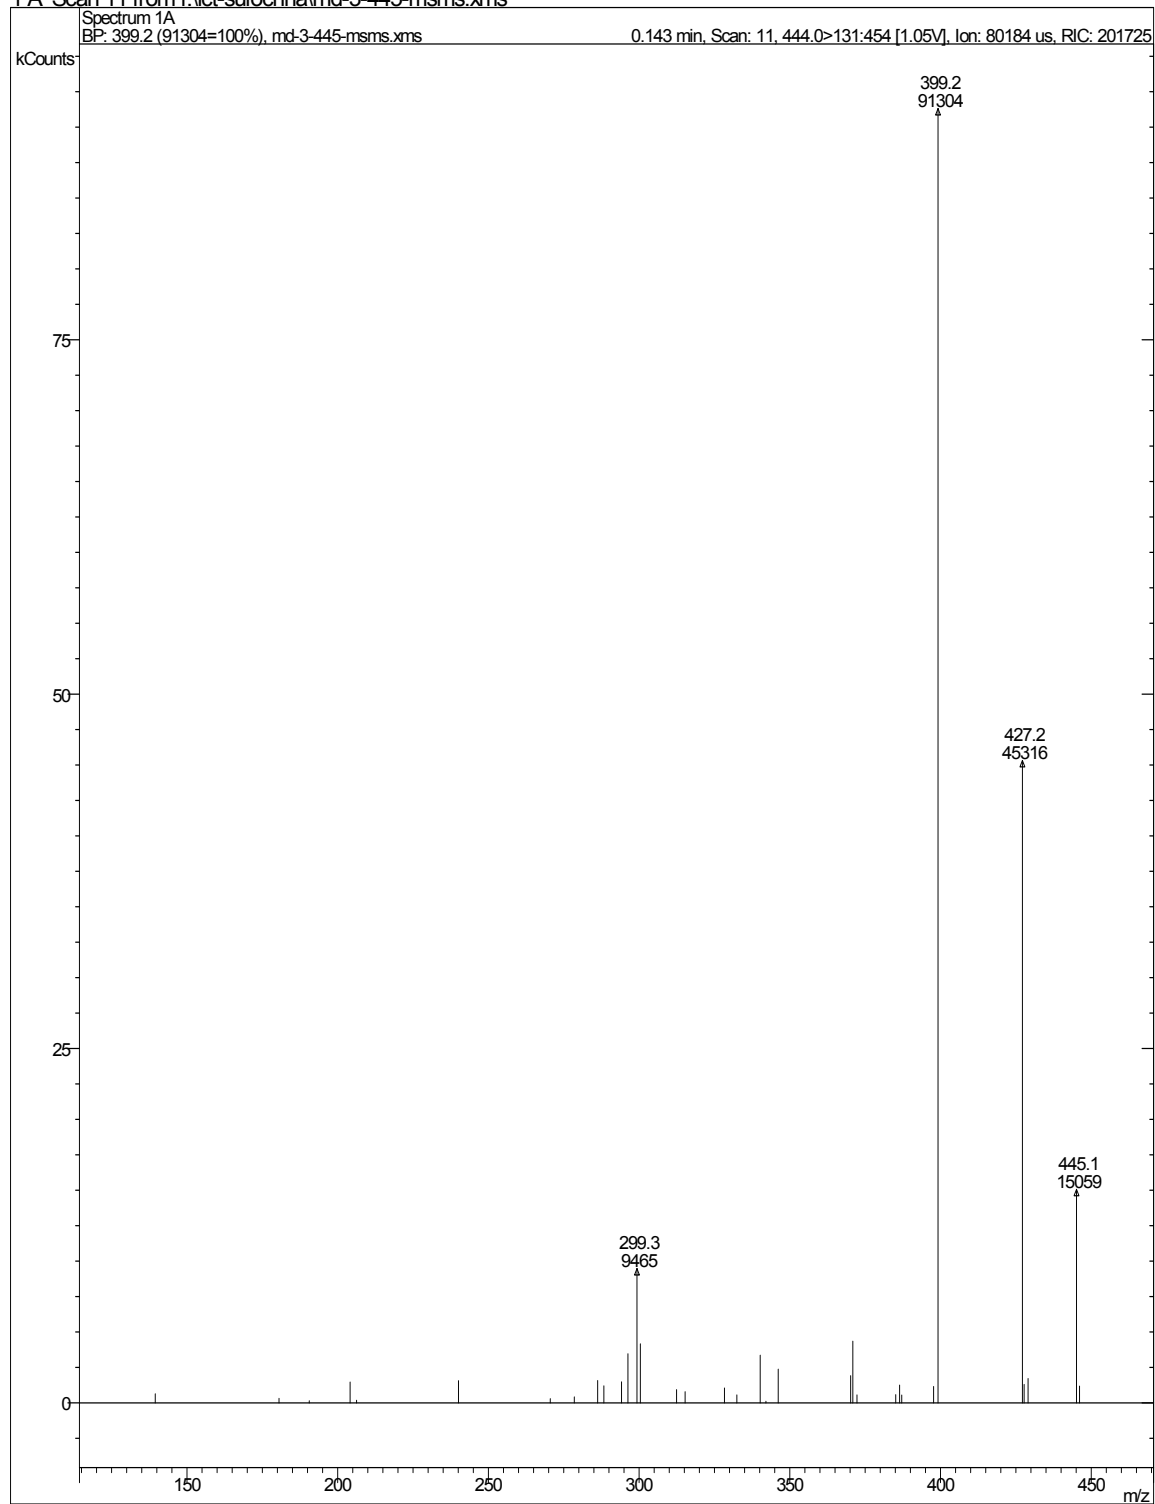

**Fig. S29. Mass Spectra of MD3**

Spectrum Plot - 2/27/2019 11:19 AM

1 A Scan 4 from f:\ict-sulochna\md-4\_-ve-450-msms.xms

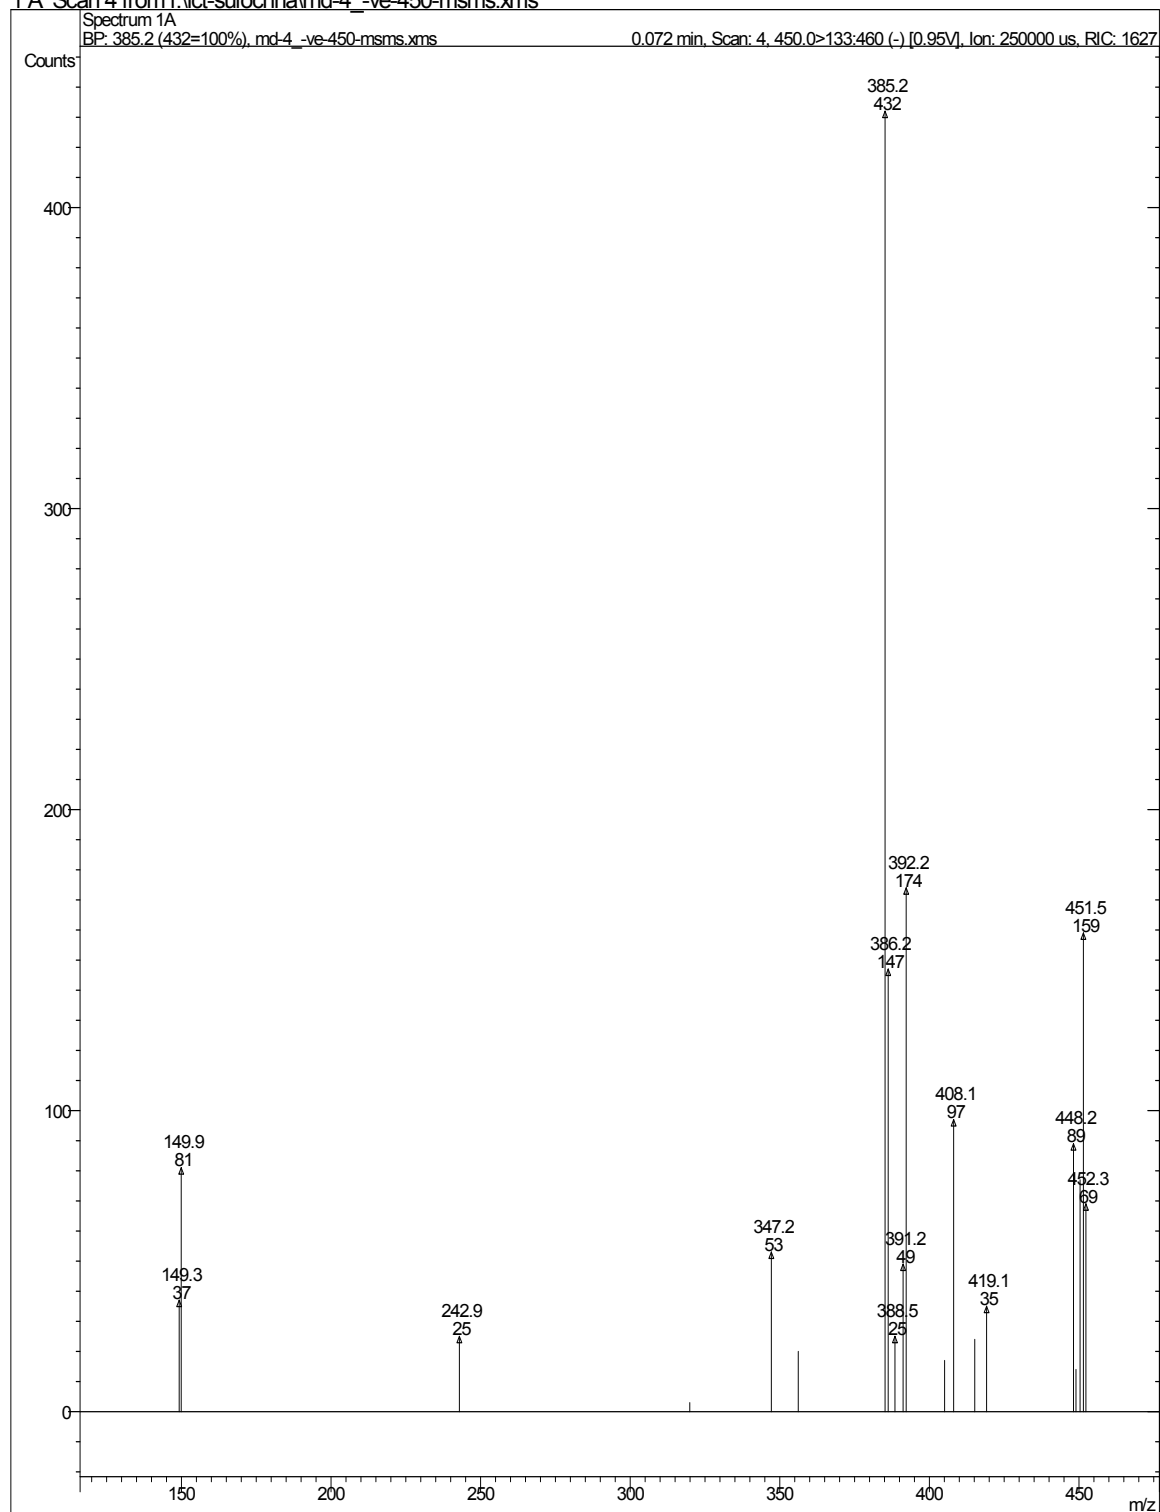

**Fig. S30. Mass Spectra of MD4**

Spectrum Plot - 2/27/2019 11:20 AM

1 A. Scan 26 from f:\ict-sulochna\md-5-455-msms.xms

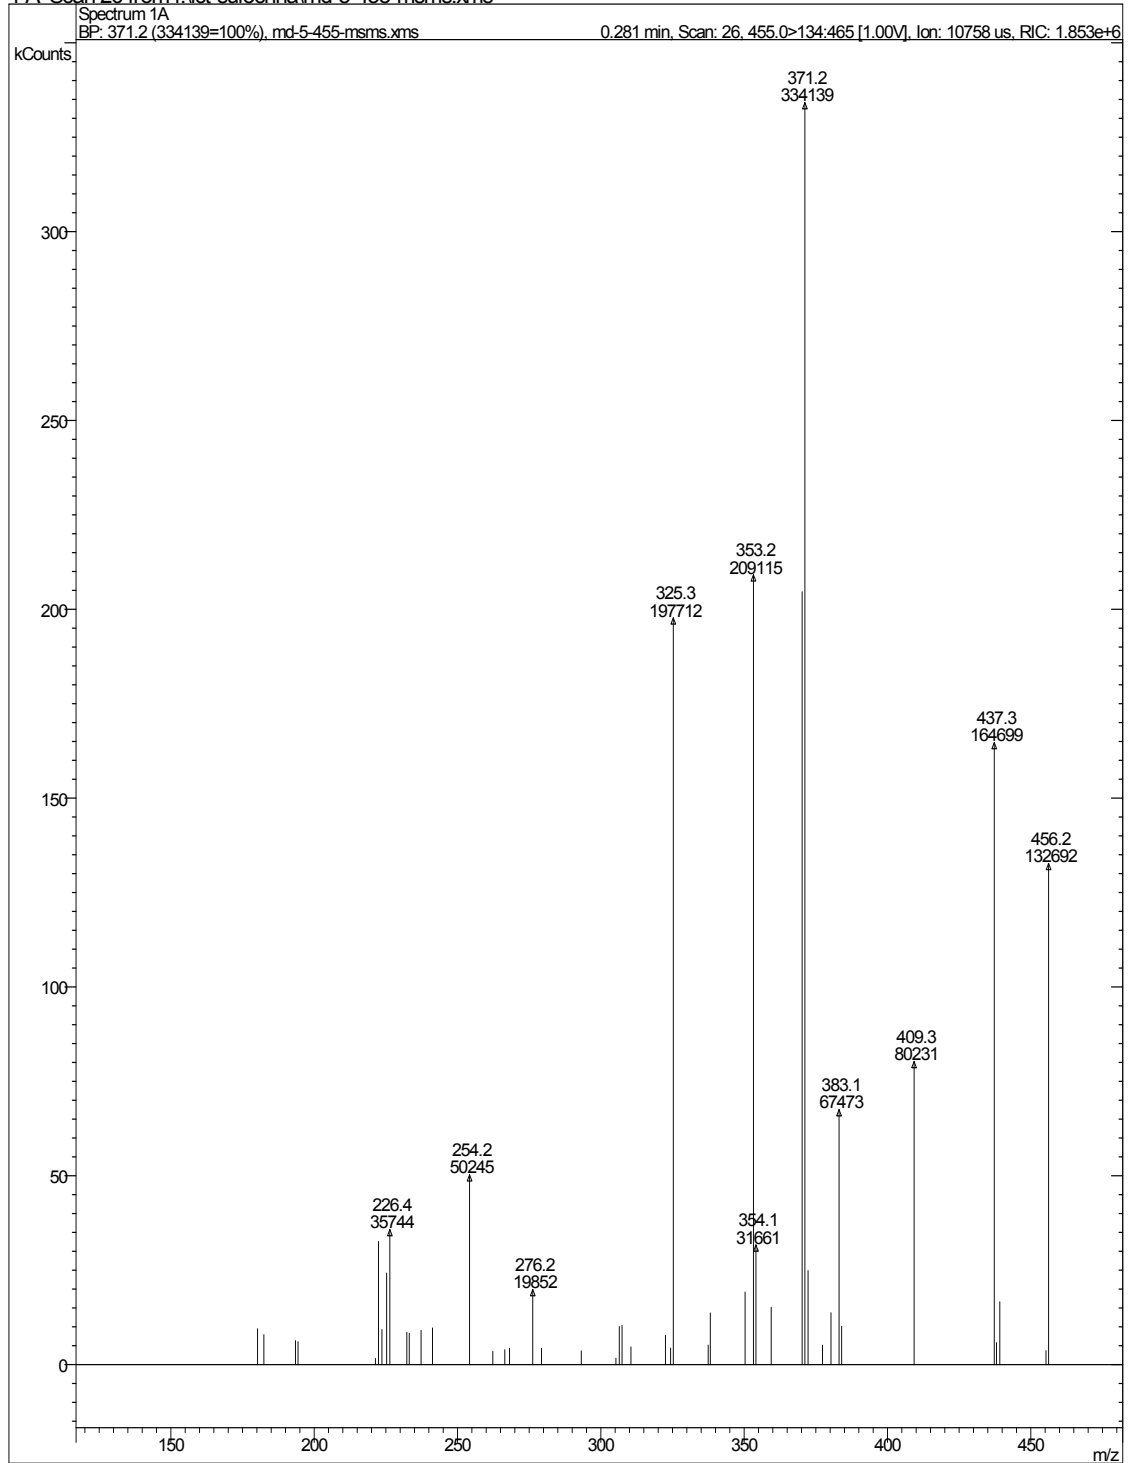

Fig. S31. Mass Spectra of MD5

# Spectrum Plot - 2/27/2019 11:24 AM

1 A Scan 8 from f:\ict-sulochna\md-6-463-msms.xms

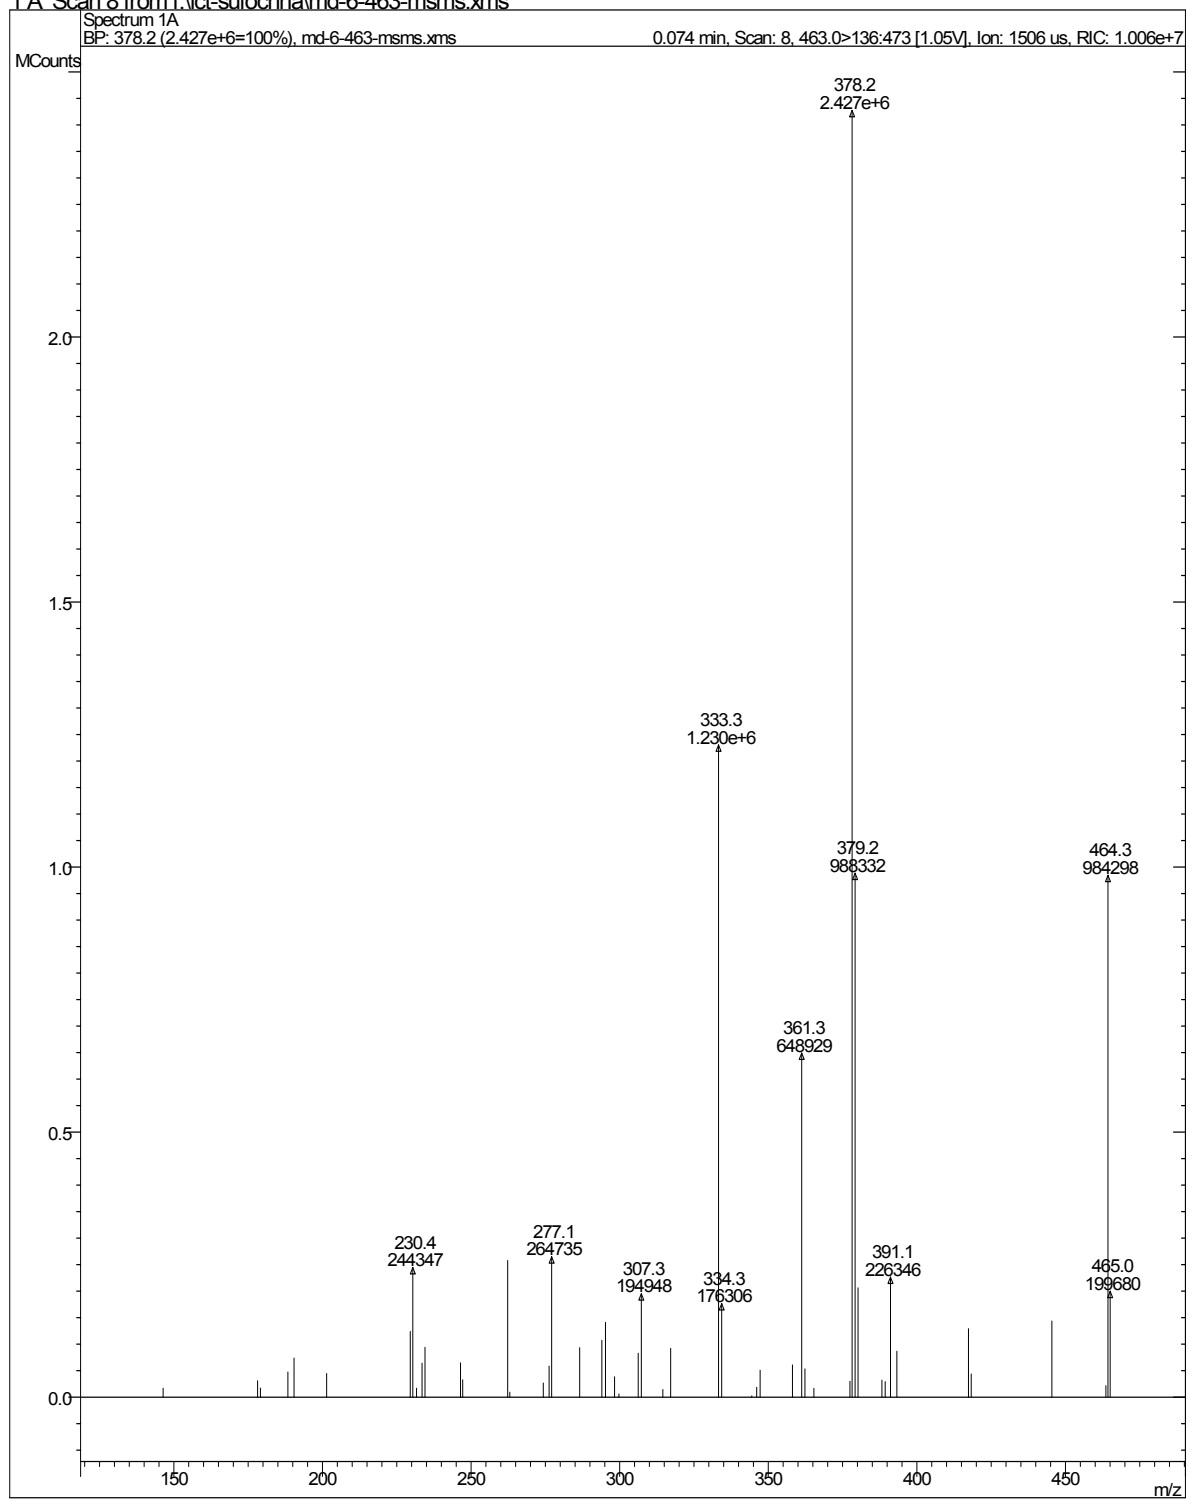

**Fig. S32. Mass Spectra of MD6**
